1 **Flies adaptively control flight to compensate for added inertia**

2 Wael Salem, Benjamin Cellini‡, Eric Jaworski, Jean-Michel Mongeau\*

3 Department of Mechanical Engineering, The Pennsylvania State University, University Park, PA,  
4 USA

5 ‡ Present address: Department of Mechanical Engineering, University of Nevada, Reno, NV,  
6 USA

7 \* Corresponding author

8 **Email:** [jmmongeau@psu.edu](mailto:jmmongeau@psu.edu)

9 **Keywords:** *Drosophila*, feedback control, mechanical loading, damping, optomotor response

## 10 **Abstract**

11 Animal locomotion is highly adaptive, displaying a large degree of flexibility, yet how this flexibility  
12 arises from the integration of mechanics, sensing and neural control remains elusive. For instance,  
13 animals require flexible strategies to maintain performance as changes in mass or inertia impact  
14 stability. Compensatory strategies to mechanical loading are especially critical for animals that rely  
15 on flight for survival. To shed light on the capacity and flexibility of flight neuromechanics to  
16 mechanical loading, we pushed the performance of fruit flies (*Drosophila*) near its limit and  
17 implemented a control theoretic framework to quantify how flies compensated for added inertia.  
18 Flies with added inertia were placed inside a virtual reality arena which enabled free rotation about  
19 the vertical (yaw) axis. Adding inertia increased the fly's response time yet had little influence on  
20 overall gaze performance. Flies maintained stability following the addition of inertia by adaptively  
21 modulating both visuomotor gain and damping. In contrast, mathematical modeling predicted a  
22 significant decrease in flight stability and performance. Adding inertia altered saccades, however  
23 flies compensated for the added inertia by increasing yaw torque production, indicating that flies  
24 sense that they are mechanically loaded. Taken together, in response to added inertia flies trade  
25 off reaction time to maintain flight performance through adaptive neural modulation. Our work  
26 highlights the flexibility and capacity of motor control in flight.

27

## 28 **Introduction**

29

30 Organisms display a wide array of compensatory strategies to maintain function and performance.  
31 Compensatory strategies to mechanical loading are particularly important for flying animals that  
32 rely on stable flight for finding food, mate, escape predators, etc. In flying insects, the most drastic  
33 weight fluctuations can arise from feeding (Mujires et al., 2017b) and carrying loads (Mountcastle  
34 et al., 2015), and can triple overall weight in some cases (van Veen et al., 2020). Previous studies  
35 have investigated the robustness of flying insects to small changes in weight or inertia, e.g.,  
36 (Combes et al., 2020), but the underlying neuromechanical control strategies used to maintain  
37 performance are not well understood. Pushing flying insects beyond minor changes in weight, in  
38 conjunction with a control theoretic framework, could unravel modes and control strategies that are  
39 obscured under natural conditions (Salem et al., 2022). This approach in turn could provide unique  
40 insights into the capacity of the nervous system outside the natural context and the role that  
41 different sensory modalities play in flight compensation. Indeed, pushing insects beyond their  
42 natural context has been fruitful to study the neuromechanics of locomotion on land and in air  
43 (Jindrich and Full, 2002; Revzen et al., 2013; Ristroph et al., 2010; Ristroph et al., 2013).

44 Here, we used system identification to examine the impact of added yaw inertia on the flight  
45 performance of tethered fruit flies free to rotate about the yaw axis. To quantify compensatory  
46 strategies, we perturbed the gaze stabilization response of flies by placing flies inside a virtual  
47 reality flight simulator. Our paradigm allowed flies to close the loop between visual stimulus and  
48 their gaze by rotating about the yaw axis. The yaw inertia of fruit flies was altered by mounting 3D  
49 printed cylinders with distinct inertia onto the magnetic pin. This paradigm pushed the performance  
50 of flies beyond natural conditions as lift generation and yaw stabilization were decoupled, thus  
51 providing insights into the capacity of the nervous system to adapt yaw steering. By increasing the  
52 yaw inertia of fruit flies by up to sixty-four times (64X), we found that altering inertia had a noticeable  
53 impact on both the performance and timing of the yaw gaze stabilization response. Using a control  
54 theoretic framework, we demonstrated that adding inertia did not significantly alter the yaw  
55 response of fruit flies but intriguingly resulted in a larger response time. Flies maintained similar

56 performance across range of added inertia by increasing both damping and visuomotor gain, likely  
57 through the integration of visual and mechanosensory feedback.

58

## 59 Results

60

### 61 Flies maintained similar performance at the expense of increased response time to stabilize 62 gaze

63 Fruit flies were tethered to a magnetic pin and placed inside a virtual reality arena. This  
64 configuration restricted the motion of flies to rotation about the yaw axis. The yaw inertia of fruit  
65 flies was altered by mounting small 3D-printed cylinders of distinct sizes onto the magnetic pin  
66 (Figure 1A–C & Methods). To ensure our study spanned a wide range of added inertias, we  
67 designed eight cylinders with logarithmically increasing yaw inertias (see Methods). The smallest  
68 cylinder was approximately the same yaw inertia of a fruit fly ( $5.2 \times 10^{-13}$  kg m<sup>2</sup>), whereas the yaw  
69 inertia of the largest cylinder was approximately 64X that of a fruit fly. To measure the  
70 impact of altering inertia on flight performance and stability, we first investigated how increasing  
71 inertia altered yaw stability in the presence of a static visual panorama. Failure to maintain a stable  
72 heading following changes in inertia could indicate a decrease in flight stability. Increasing the yaw  
73 inertia by 16X or more caused flies to oscillate about the yaw axis (Figure 1D & Movie S1). With  
74 increasing inertia, the magnitude and frequency of these oscillations increased and decreased,  
75 respectively (Figure 1E). In contrast, flies with no added inertia did not exhibit such large oscillations  
76 (Figure 1D,E). The presence of such oscillations suggests that flies' stability is impaired by adding  
77 inertia beyond a certain amount.

78 To quantify the impact of increasing inertia on flight performance, we presented flies with a sum-  
79 of-sines visual stimulus composed of nine sine waves with distinct frequencies and phase (see  
80 Methods & Movie S2). The stimulus produced an optomotor response in all the tested groups with  
81 and without added inertia (Figure 1F & Figure S1A). Interestingly, even flies with added inertia up  
82 to 64X stabilized the moving background. However, a closer inspection of the time domain data  
83 revealed a change in performance when the fly's inertia was increased by 16X or more, consistent  
84 with our findings for flies presented a static visual stimulus (Figure 1F & Figure S1). When the  
85 inertia of flies was increased by more than 8X, the average response appeared smoother due to  
86 the attenuation of the higher frequency components, suggesting that adding inertia primarily  
87 influences high-frequency gaze stabilization performance. At the highest tested inertia (64X), the  
88 optomotor response was significantly attenuated and no longer coherent with the visual stimulus at  
89 most frequencies (Figure Supplement 1B). Therefore, we excluded data collected at this inertia  
90 from further frequency domain analysis.

91 To further examine the impact of added inertia on flight performance, we conducted a frequency  
92 domain analysis of the responses to sum-of-sines visual stimuli. By computing gain and phase  
93 difference, we mathematically quantified the changes in performance at each frequency component  
94 of the stimulus. First, we predicted how the performance of flies might change without changes in  
95 controller parameters (neural control). We modeled the yaw body dynamics of the fly as a first-  
96 order system (Figure 1C) of the form

$$I_t \dot{\omega} = -C\omega + \tau \quad \text{Eq. 1}$$

97 where,  $I_t$  is the total yaw inertia of fruit flies (fly inertia + cylinder inertia),  $C$  is the yaw damping,  $\omega$   
98 is the yaw angular velocity, and  $\tau$  is the yaw torque produced by the fly. This modeling assumption  
99 is consistent with the notion that fly flight about yaw is damping dominated (Dickson et al., 2010).  
100 By assuming that the visual system acts primarily as a proportional gain on velocity—consistent  
101 with previous studies that showed little contribution of integral feedback during yaw gaze  
102 stabilization maneuvers (Cellini et al., 2022; Salem et al., 2022)—the open-loop transfer function  
103  $\frac{\Omega(s)}{E(s)} = G(s)$  can be written as:

$$G(s) = e^{-\tau_d s} \frac{K_p}{I_t s + C} \quad \text{Eq. 2}$$

104 where  $s$  is the complex frequency,  $E(s)$  is the Laplace transform of the error (velocity) between the  
105 stimulus and fly motion,  $K_p$  is the visuomotor gain, and  $\tau_d$  is time delay due to neural processing.  
106 Increasing the inertia in [Eq. 2](#) should alter the pole location and consequently the stability of the  
107 system. Therefore, increasing yaw inertia without changing damping would push the open-loop  
108 pole towards the imaginary axis. When considering the closed-loop system—which is expressed  
109 as  $G(s)/(1 + G(s))$ —and considering constant proportional gain, increasing inertia increases the  
110 system's time constant (ratio of inertia to damping), and thus a large added inertia could push the  
111 system close to a marginally stable or unstable state (Aström and Murray, 2010).

112 By simulating an increase in inertia (without changing other parameters) and using experimentally  
113 determined constants for  $\tau_d$ ,  $K_p$  and  $C$  ([Eq. 2](#)) (Salem et al., 2022), we predicted the closed-loop  
114 frequency response of flies with added inertia. Importantly, baseline parameters were estimated  
115 from flies with no added inertia (See [Methods](#) for details). We predicted that the gain would  
116 significantly drop at all frequencies if the inertia was altered without changing the baseline damping  
117 and visuomotor gain ([Figure 2A](#)). We further predicted that the phase difference would decrease  
118 significantly at the lower frequencies but converge to the same value at higher frequencies ([Figure](#)  
119 [2A](#)). The experimentally measured frequency domain response did not resemble our prediction  
120 ([Figure 2B](#)). The gain was almost unchanged for all inertias up until 0.9 Hz, and the phase  
121 difference decreased far beyond our predicted limit ([Figure 2B top panel](#), [Table S1](#), [Figure S2](#)).  
122 Because mechanics alone could not account for the experimental data, our results strongly imply  
123 that flies tune internal gains to compensate for added inertia. At frequencies higher than 0.9 Hz,  
124 the difference in gain among the inertia altered flies became statistically significant ([Table S1](#)) but  
125 did not follow a specific pattern. In fact, flies that had their inertia increased by 16 and 32 times had  
126 the largest gains at 1.45 Hz and 2.25 Hz. However, the increase in inertia began to reduce the gain  
127 at frequencies above 3.45 Hz. At frequencies higher than 3.45 Hz, the gain was significantly smaller  
128 at all added inertias compared to the intact case ([Table S1](#)). Interestingly, the response when the  
129 yaw inertia was increased by 32X resembled the response of a second-order underdamped system  
130 rather than that of a first-order system. The gain peaked at 2.25 Hz and was greater than unity. However,  
131 the frequency at which the peak occurs coincides with the frequency of observed oscillations with  
132 a static stimulus ([Figure 1E](#), [Figure 2B](#)). This peak complicated the interpretation of the gain data  
133 at this inertia as it could be a result of superimposed noise or due to higher order dynamics.

134 Looking at the phase data can shed light on the underlying cause behind this rise in gain. Increasing  
135 inertia altered the phase difference in a completely different manner than predicted by simulation  
136 ([Figure 2A,B](#)). The variation in phase difference became more significant at larger inertias for  
137 stimulus frequencies at and above 1.45 Hz ([Figure 2B lower panel](#); [Table S2](#)). Such changes in  
138 phase cannot be explained purely by altering the damping or inertia in our model ([Eq. 2](#)). In the  
139 absence of a time delay, the phase difference of first-order systems converges to  $-90^\circ$  at high  
140 frequencies. Hence, the observed changes in phase difference are likely a result of an increase in  
141 the time delay ( $\tau_d$ ). Simulating [Eq. 2](#) with no added inertia and delays estimated from the empirical  
142 phase difference (see [Methods](#)) captured the changes in both the gain and phase difference ([Figure](#)  
143 [2C](#)). Altering the time delay even captured the peak observed at 32X added inertia. The  
144 interpretation of this result is not intuitive as time delays are usually associated with changes in  
145 phase difference but not gain. However, altering the delay in the open-loop system influenced both  
146 the gain and phase of the closed-loop system. Changes in the time delay of the intact system could  
147 capture our empirical results, however this simulation did not account for changes in inertia and did  
148 not consider how the remaining internal parameters are modulated to maintain the same gain.  
149 Altogether, our findings demonstrate that flies can compensate for an increase in inertia, with the  
150 trade-off of increased time delay.

151 **The head compensates for loss of stability but not for changes in gaze performance**

152 We demonstrated that increasing the yaw inertia of flies by more than eight times caused a modest  
153 change in flight performance and stability. When presented with a visual sum-of-sines stimulus,  
154 fruit flies experienced a small decrease in gain and phase at frequencies larger than 1.45 Hz. On  
155 the other hand, flies presented with a static stimulus began to oscillate about the yaw axis and  
156 failed to maintain stable body heading. Taken together, these results indicate that the body  
157 response of flies significantly deteriorated with the addition of inertia. However, this may not be the  
158 case for the overall gaze as head motion could be used to compensate for changes in body motion  
159 (Cellini and Mongeau, 2020a). Previous work explored the overall role of the head in gaze  
160 stabilization (Cellini and Mongeau, 2020a). The head compensates for fast visual motion, whereas  
161 the body compensates for slower visual motion. By combining head and body motion, flies can  
162 improve overall gaze stabilization performance over a large range of visual motion velocity (Cellini  
163 et al., 2022). Thus, the head may adjust its motion to compensate for changes in stabilization  
164 performance following the addition of inertia to the body.

165 To gauge the compensatory role of the head, we tracked the motion of the head in experiments  
166 with a sum-of-sines and static background stimulus. We then conducted a frequency domain  
167 analysis to determine the response of the head (Figure S5A). When presented with a sum-of-sines  
168 stimulus, the head did not appear to play a large compensatory role. The gain and phase difference  
169 of the head were similar across all groups of flies. While the phase difference at the highest three  
170 frequencies fluctuated among different inertia treatments, it did not follow a clear trend. This is likely  
171 due to the fact that body motion influences the visual input to the head controller, and body motion  
172 varies greatly at high frequencies for different added inertia (Figure 2B). Thus, changes in visual  
173 feedback likely led to these changes in head phase. Of interest was the peak in gain observed at  
174 ~2.3 Hz (Figure S5A), which coincided with the peak observed in body gain at the same frequency  
175 (Figure 2B). Changes in head gain at this frequency are likely an attempt to compensate for  
176 elevated oscillatory body motion within this range of frequencies.

177 In stark contrast, flies presented with a static stimulus altered head motion to compensate for body  
178 instabilities. We previously showed that flies oscillated about the yaw axis when their inertia was  
179 increased by 16X or more, and the frequency of these oscillations were dependent on the amount  
180 of added inertia (Figure 1D,E). To compensate for these body oscillations and maintain stable gaze,  
181 flies increased head motion at those frequencies, presumably to cancel out body motion (Figure  
182 S5B). However, the change in head motion was not sufficient to completely cancel body motion  
183 (Figure S5B). Interestingly, the time difference between the head and body increased with larger  
184 inertias (Figure S5C) ( $p^{***}$ , ANOVA; DoF = 3).

### 185 **Flies increased visuomotor gain and damping to maintain the same stability**

186 We demonstrated that increasing inertia noticeably altered the performance and timing of the  
187 optomotor response especially at higher frequencies (Figure 2B). From a control perspective,  
188 increasing the inertia of a first-order system with a proportional controller shifts the pole of this  
189 system closer to the imaginary axis, and causes a significant drop in the gain and phase difference  
190 (Figure 2A). A closed-loop system could possibly compensate for changes in stability by altering  
191 its controller through an adaptive control scheme. However, if the goal is to maintain the same  
192 performance and stability, a change in proportional control alone cannot produce the desired  
193 change in the system's dynamics.

194 To shed light on how increasing yaw inertia altered the yaw dynamics of flies, we fit the empirical  
195 frequency response functions (FRFs) (Figure 2B) to a first-order transfer function with a delay, one  
196 pole, and no zeros (Cellini et al., 2022). Specifically, we used a least square estimate to fit the  
197 open-loop transfer function  $G(s)$  of flies with and without added inertia (Figure S3A) (Roth et al.,  
198 2012), where the open-loop transfer function is of the form shown in Eq. 2. There was some  
199 individual variation between animals when fitting, and this variation became more prominent at the  
200 higher inertias. However, a first order model captured the open-loop dynamics of the optomotor  
201 response of all groups (r-squared ~88%, see Figure S3B). To verify that our fit model properly

202 captured the time domain response, we simulated the fit transfer functions using the same sum-of-  
203 sines visual stimulus as the input. The simulated response closely resembled the actual response  
204 of flies (Figure S4).

205  
206 Estimating the open-loop parameters can shed light on the underlying neuromechanical control  
207 strategies used by flies to compensate for changes in inertia. The numerator is the visuomotor gain  
208 which could be modulated by the fly. On the other hand, the denominator is used to determine the  
209 location of the open-loop pole and thereby measure the stability of the open-loop system. Finally,  
210 the delay term can provide an estimate of the system's lag due to sensorimotor processing.  
211 Comparing the various fits, we first noticed that changes in the system time delay were positively  
212 correlated to changes in inertia (Figure 3A). With no added inertia, the time delay was around 20  
213 ms, which is consistent with previous studies (Cellini et al., 2022). However, this delay steadily  
214 increased with increasing inertia, up to approximately 80 ms (Figure 3A).

215 Concomitantly the visuomotor gain and damping coefficient significantly changed with increasing  
216 inertia (Figure 3B,C). The mean visuomotor gain increased by two orders of magnitude from no  
217 added inertia to 32X (Figure 3B). Similarly, the damping increased by more than one order of  
218 magnitude (Figure 3C). The location of the open-loop pole changed modestly when the inertia of  
219 flies was increased by 32X (Figure 3D, Figure S3C). While adding inertia did alter pole locations  
220 ( $p=0.04$ , ANOVA, 6 DoF), the statistical analysis yielded a  $p$ -value that is marginally significant.  
221 Consequently, this statistical significance may be a result of the fluctuations in pole locations at  
222 different inertias. Flies drastically modulated their visuomotor gain and yaw damping in response  
223 to changes in inertia, however it is difficult to compare overall changes in system dynamics. To get  
224 an idea of how the dynamics of the system changed, we divided the fit transfer functions by the  
225 damping to obtain the standard form of a first-order transfer function. The open-loop transfer  
226 function becomes:

$$G(s) = e^{-\tau_d s} \frac{\frac{Kp}{C}}{s \frac{I}{C} + 1} = e^{-\tau_d s} \frac{K_{ol}}{\tau_f s + 1} \quad \text{Eq. 3}$$

227 where  $K_{ol}$  is defined as the open-loop visuomotor gain, and  $\tau_f$  is the system time constant. Indeed,  
228 estimating the open-loop gain and time constant shows that these two parameters only marginally  
229 change (Figure 3E,F). While subject to fluctuations with different amounts of added inertia, the  
230 open-loop gain and the time constant remained approximately the same regardless of how much  
231 inertia was added ( $p=0.5$  &  $0.9$  respectively; ANOVA, DoF = 6). Thus, flies increased their damping  
232 and visuomotor gain to maintain approximately the same open-loop dynamics. Compared to our  
233 simulated Bode plots (Figure 2A), flies only experienced a marginal drop in performance following  
234 addition of inertia. This suggests that flies modulate both parameters to maintain the same open-  
235 loop dynamics. Indeed, by estimating the yaw damping coefficient, we found that flies significantly  
236 increased this term to maintain the same pole location, and hence, the same body dynamics.  
237 Considering movement of the head—which play a critical role in shaping visual inputs (Cellini and  
238 Mongeau, 2020a; Cellini et al., 2021; Cellini et al., 2022)—did not change these conclusions (Figure  
239 S5). Therefore, flies maintained roughly the same body dynamics at the expense of a delayed  
240 response to the visual stimulus.

#### 241 **Changes in yaw damping cannot be explained by passive aerodynamics and require active** 242 **feedback**

243 Using system identification techniques, we found that flies regulated yaw damping to maintain the  
244 same open-loop body dynamics following changes in inertia. Damping could be actively modulated  
245 though neural control using an inner mechanosensory feedback loop (Figure 4A) (Elzinga et al.,  
246 2012; Fuller et al., 2014). Alternatively, changes in damping can be passively regulated as a  
247 byproduct of changes in wing kinematics to meet the larger torque requirements imposed by adding  
248 inertia. Flapping flight exhibits passive damping about the yaw axis which is generated as a  
249 byproduct of drag on wings during flapping. Hence, when flying animals with flapping wings rotate

250 about yaw, a torque is passively produced in the opposite direction of motion. This torque is dubbed  
251 flapping counter-torque and damps out turns (Cheng et al., 2010), and can be estimated from wing  
252 morphology and kinematics to yield a yaw damping coefficient (Hedrick et al., 2009).

253 To determine if the change in yaw damping was actively modulated or a by-product of the increase  
254 in FCT due to changes in wing kinematics, we first estimated the 3D wing kinematics of  
255 magnetically tethered fruit flies with distinct added inertia (see Methods). By Incorporating wing  
256 morphology information with wing kinematics of flies with different added inertia (Figure 4B), we  
257 found that the FCT does not noticeably change following the addition of inertia if wing beat  
258 frequency and rotation angle was to remain the same (Figure 4C). This result may be skewed as  
259 flies can regulate wing beat frequency and the rotation angle, hence an increase in modulating  
260 these two parameters can significantly influence the FCT. To tease out their relative contribution to  
261 the changes in passive yaw damping, we simulated the FCT model (see Methods) and found that  
262 flies would need to flap at around 800 Hz to achieve the damping estimated in the FRFs regardless  
263 of changes in rotation angle (Figure 4D). This value is much larger than what has been previously  
264 reported (Tammero and Dickinson, 2002) and far beyond the physical limit of fruit flies. Therefore,  
265 an increase in FCT is not enough to explain the increase in the yaw damping and requires active  
266 control.

267 Fruit flies combine sensory information from multiple modalities to control and regulate flight (Fuller  
268 et al., 2014; Sherman and Dickinson, 2004). Therefore, the damping coefficient of the body is likely  
269 regulated through an inner sensory feedback loop other than vision (Figure 4A). By integrating an  
270 inner loop within the open-loop transfer function  $G(s)$ , Eq. 2 can be written as:

$$G(s) = \frac{K_p}{Is + C} = \frac{K_p}{Is + C_{fct} + K_h} \quad \text{Eq. 4}$$

271 where  $C_{fct}$  is the passive yaw damping due to flapping counter-torque, and  $K_h$  is the inner loop  
272 feedback gain that modulates damping (here we omit the delay term  $e^{-\tau_d s}$  for clarity) (Elzinga et  
273 al., 2012). The visuomotor gain,  $K_p$ , can be factored out of Eq. 4 to obtain the formulation of the  
274 second inner loop:

$$L(s) = \frac{G(s)}{K_p} = \frac{1}{Is + C_{fct} + K_h} \quad \text{Eq. 5}$$

275 Since the halteres play an important role in encoding angular velocity about the yaw axis and act  
276 faster than vision (Dickinson, 1999), the inner feedback loop is likely driven using mechanosensory  
277 feedback from the halteres. Therefore, by modulating  $K_h$  flies could actively increase damping  
278 about the yaw axis to maintain the same body dynamics. Changes in the haltere feedback can be  
279 estimated by subtracting the FCT from the active yaw damping:

$$K_h = C - C_{fct} \quad \text{Eq. 6}$$

280 However, this results in negative values of  $K_h$  at 1X inertia which implies that haltere feedback  
281 transitions from positive to negative feedback as inertia is increased. To facilitate comparison  
282 across all inertia, we shifted our data so that the lowest estimated value of haltere gain was zero.  
283 Using this posited control architecture, we estimated that the haltere gain increased with increased  
284 inertia to maintain the same yaw damping (Figure 4E). On the other hand, the open-loop visuomotor  
285 gain  $K_p$  is regulated using visuomotor feedback and maintains the same open-loop performance  
286 which would have significantly deteriorated due to elevated inertia and damping. To summarize,  
287 our simulation suggests that flies rely on feedback from multiple sensory modalities to maintain the  
288 same body dynamics in response to changes in inertia. Our findings hint that flies implement an  
289 adaptive control scheme to compensate for changes in inertia. Here, the gains are modulated to  
290 maintain gaze stabilization performance.

291 **Flies compensate for added inertia to control saccades**

292 Saccades are ballistic movements in which flies change their heading in the span of 50–100 ms  
293 (Muijres et al., 2015). Such maneuvers have been observed in free and tethered flight (Bender and  
294 Dickinson, 2006a; Cellini and Mongeau, 2020b; Land and Collett, 1974). In the magnetic tether,  
295 these saccades can be externally triggered from visual cues or internally triggered (spontaneous  
296 saccades) (Censi et al., 2013; Mongeau and Frye, 2017). By presenting inertia altered flies with a  
297 static stimulus, we measured the impact of inertia on the dynamics of spontaneous saccades. Our  
298 simulation (see Methods) predicted that without active control of yaw torque, the displacement,  
299 peak velocity, and duration of saccades should greatly diminish following any increase in inertia  
300 (Figure 5A bottom panel). Compared to unaltered flies, flies with added inertia exhibited a clear  
301 change in saccade dynamics that did not match our prediction (Figure 5A top panel, Figure S6).  
302 This was also accompanied by an increase in peak yaw torque during a saccade (Figure 5B). Flies  
303 with added inertia exhibited an increase in saccade displacement compared to unaltered flies. This  
304 difference became more prominent as the inertia increased (Figure 5C). In contrast, the peak  
305 velocity of saccades marginally decreased with increasing inertias (Figure 5D). However, saccade  
306 durations exhibited the most change with increasing added inertia (Figure 5D). At no added inertia,  
307 the mean saccade duration was just below 100 ms. This value steadily increased with added inertia,  
308 and was close to 400 ms when the inertia of flies was increased by 64 times. Complicating this  
309 analysis is the large number of samples collected for each inertia treatment, thus tiny differences  
310 in saccade dynamics could potentially result in a small *p* value using conventional statistical  
311 methods. To address this limitation, we computed Hedge's *g*, which is a metric that is independent  
312 of sample size (Kelley and Preacher, 2012). Using this effect size model, we found that adding  
313 inertia had the largest overall impact on saccade duration and resulted in the largest values of  
314 Hedge's *g*. As expected, such changes in saccade dynamics required overall higher torques  
315 exerted over a longer duration (Figure 5B). Together, these results suggest that flies adaptively  
316 control saccade dynamics to compensate for added inertia.

## 317 Discussion

318  
319 We discovered that fruit flies adaptively control flight following a large increase in yaw inertia.  
320 Specifically, by modulating visuomotor gain and damping, flies compensated for changes in inertia  
321 with only minor changes in performance at the cost of overall stability and a larger response time.  
322 Such compensatory changes could not be explained by feedback alone (Figure 2A), nor could they  
323 be achieved using feedback from one sensory modality (Figure 3 & 4). Flies adjusted the initial  
324 torque to generate compensatory saccades to added inertia, suggesting that they modulate internal  
325 control commands and sense the extra mechanical load. We propose a control scheme which is  
326 composed of two feedback loops: a nested loop is driven by mechanosensory feedback that  
327 regulates yaw damping and an outer loop that regulates visuomotor gain (Figure 4). Taken  
328 together, our findings indicate that flies modulate neural controller gains to maintain performance  
329 at the expense of increased response time.

## 330 Flies compensate for added inertia by trading-off response time

331 Magnetically tethered flies with added inertia suffered only a marginal drop in gain, but a significant  
332 drop in phase during gaze stabilization. When the yaw inertia of flies was increased by 32X, flies  
333 began to exhibit a peak in closed-loop (behavioral) gain which is characteristic of underdamped  
334 second order systems, indicating that performance had begun to suffer as the gain was larger than  
335 unity around this peak (Figure 2B). The underlying reason behind this shift in dynamics is not  
336 intuitive. The dip in phase became more prominent at higher inertia and was a direct result of  
337 changes in the system time delay. Indeed, simulations indicated that increasing the time delay  
338 alone captured the observed changes in the frequency response of flies following addition of inertia  
339 (Figure 2C). At present the underlying mechanism driving this change in time delay remains  
340 obscure. Changes in time delay could be a manifestation of some higher order dynamics that  
341 cannot be modeled using the current framework. Work that investigated flower tracking in  
342 hawkmoths in environments with different levels of luminance found that lower levels of light



343 resulted in larger time delays, which can be modeled by a change in the low-pass filter time constant  
344 of visual processing (Sponberg et al., 2015). While the body dynamics of moths were not modified  
345 in that study, this study hints that the observed changes in delay in fruit flies may be due to active  
346 neural modulation. Alternatively, the increase in time delay could be a result of an increase in  
347 reaction time, that is a consequence of the fly compensating for an unusual perturbation. Indeed,  
348 larger time delays can negatively impact system yaw stability in insect flight (Elzinga et al., 2012).  
349 Taken together, in response to added inertia, flies maintain roughly the same gaze stabilization  
350 performance at the expense of stability and response time.

351 Our paradigm allowed us to push the performance of flies beyond natural conditions as lift  
352 generation and yaw stabilization were decoupled, which here we used to reveal the capacity of the  
353 nervous system to adapt yaw steering. Indeed, in free flight, flies with 1X or 2X added inertia may  
354 be more naturalistic. Nevertheless, the ability of flies with large added inertia to stabilize gaze in  
355 the magnetic tether is a strong indication of the capacity for adaptive compensatory behavior. Our  
356 results should be interpreted with appropriate caution as the tethering paradigm restricts the motion  
357 of flies to rotation about the yaw axis. This is unnatural for flies, although they can perform nearly  
358 pure yaw rotation in free flight (Bergou et al., 2010). Further, the tether supports the weight of the  
359 fly and cylinder which eliminates the need for lift generation. As a result, the wing kinematics of  
360 magnetically tethered flies likely deviate from those in free flight.

361

## 362 **Flies adaptively control saccade dynamics**

363 Increasing the yaw inertia of flies altered saccade dynamics (Figure 5). By modeling the yaw  
364 dynamics of tethered flies as a first order system, we could predict how saccade dynamics should  
365 change in the absence of sensory feedback and yaw torque modulation (Figure 5A). By assuming  
366 flies produced the same yaw torque regardless of inertia treatment, the model predicted that  
367 saccades should exhibit drastically smaller displacements, peak velocities, and durations (Figure  
368 5A lower panel). This is in stark contrast to empirical data (Figure 5A upper panel). In fact, the  
369 average velocity of saccades at different added inertias did not remotely resemble our predicted  
370 results (Figure 5A). Thus, differences between model and data suggest a mechanism that  
371 modulates saccade dynamics due to mechanical loading. Previous work found that altering haltere  
372 feedback had a significant impact on saccade dynamics (Bender and Dickinson, 2006b). Therefore,  
373 one possibility is that changes in saccade dynamics are a result of changes in haltere gyroscopic  
374 feedback due to alterations in body inertia. This hypothesis also presumes that the fly has some  
375 internal model or, alternatively, a goal at the start of the saccade and relies on mechanosensory  
376 feedback to achieve this goal. Work measuring the torque production of rigidly tethered flies during  
377 a saccade reported durations as high as 500 ms (Tammero and Dickinson, 2002); much larger than  
378 anything reported in freely flying or magnetically tethered flies (Cellini and Mongeau, 2020b). This  
379 also suggests that contrary to previous findings, flies employ mechanosensory feedback not only  
380 when 'braking' during a saccade, but also to modulate saccade initiation. Alternatively, flies may  
381 have updated an internal model which accounted for the added inertia. By comparing the saccade  
382 torque profile of flies with added inertia to unaltered flies, we found a clear increase in torque  
383 production with increasing inertia (Figure 5B). While much larger in magnitude, the torque profile  
384 of flies with added inertia resembled that of intact flies, which suggests that changes in saccade  
385 dynamics may be a result of mechanosensory feedback instead of learning. Further supporting this  
386 conclusion is the observed elevation in saccade duration. Intriguingly, humans similarly  
387 compensate for artificially increased inertia during rapid rotational maneuvers (Lee et al., 2001).

## 388 **Flies maintain stability by combining sensory feedback with adaptive control**

389 By combining experiments with simulation, we found that increasing inertia had little impact on gaze  
390 stabilization performance. While subject to some changes, the open-loop gain and pole locations  
391 did not deviate as much as predicted from simulation (Figure 3D,E). Similarly, the estimated open-  
392 loop gain and time constant did not considerably vary with added inertias (Figure 3E,F). Such a

393 feat was accomplished by increasing the effective yaw damping and visuomotor gain (Figure 3B,C).  
394 Using simulations, we found that damping must be actively modulated using neural control as  
395 passive damping alone cannot produce enough damping (Figure 4).

396 Based on this finding, we propose an adaptive control strategy which allows flies to regulate  
397 damping and visuomotor gain using multiple feedback loops. As flies integrate visual and  
398 mechanosensory feedback to stabilize flight (Sherman and Dickinson, 2004), we posit that flies  
399 regulate damping using a nested loop driven by mechanosensory feedback, whereas gain is  
400 regulated through an outer loop using vision (Figure 4A) (Elzinga et al., 2012). Using this scheme,  
401 flies can regulate damping by changing the haltere gain, whereas the open-loop gain regulates the  
402 visuomotor performance of the system. Had flies only regulated yaw damping in response to an  
403 increase in inertia, the optomotor response would have suffered a significant decrease in gaze  
404 stabilization gain at all frequencies (Figure S7). This is in stark contrast to our experimental results.  
405 Hence, tuning the visuomotor gain enabled flies to reduce the overall impact of added inertia by  
406 regulating the amount of torque produced. Through simulations, changes in inertia predicted an  
407 overall decrease in gain, even in the presence of feedback and in the absence of any modulation  
408 in internal gains (Figure 2A), thus we can conclude that flies likely implement an adaptive control  
409 scheme to compensate for changes in inertia. However, how flies regulate these internal  
410 parameters is not clear. We speculate that flies may implement an adaptive control scheme similar  
411 to a Model Reference Adaptive Scheme (MRAS) (Åström and Wittenmark, 2008). In this scheme,  
412 a system regulates the input to the plant (e.g., fly body) by comparing the observed output to  
413 reference output generated from a desired model. This hypothesis does not rule out that flies  
414 implement another adaptive scheme, or even a parallel robust scheme that relies solely on  
415 feedback. It is also possible that flies rely solely on a robust control scheme that contains a number  
416 of nested feedback loops which cannot be modeled by our current framework. Alternatively, flies  
417 may have learned a new controller altogether. In *de novo* learning, it is possible to change the  
418 entire controller to map sensory input to motor output (Yang et al., 2021). Overall, our results hint  
419 that flies implement an adaptive control scheme regulated by nested feedback loops to mitigate  
420 changes in inertia.

421

422

## 423 **Materials and Methods**

424

425 **Animal preparation:** Animal preparation was previously described in another study (Salem et al.,  
426 2020). Briefly, female fruit flies *Drosophila melanogaster* aged 3–5 days were cold anesthetized at  
427 4°C using a Peltier cooling stage. Flies were then glued to a pin under a microscope and left to rest  
428 for approximately one hour before the start of experiments. The yaw inertia was altered by gluing  
429 a 3D printed cylinder onto the stainless-steel pin (Figure 1B). After the rest period, flies were  
430 suspended between two magnets and placed inside a virtual reality arena (Figure 1A) (Reiser and  
431 Dickinson, 2008). This configuration enables tethered flies to rotate about the yaw axis while  
432 restricting motion in the other directions. The pin's yaw inertia was less than 1% that of the fly's  
433 inertia. Hence, the pin did not introduce any significant inertia that may alter the interpretation of  
434 the collected data (rod diameter = 100 µm, tip diameter = 12.5 µm; Minutien pin, Fine Science  
435 Tools), as previously demonstrated (Cellini et al., 2022). Only flies that successfully completed at  
436 least three trials were used in subsequent analysis. Flies that continuously stopped flying during  
437 experiments or had very low baseline wingbeat amplitude (less than 100°) were not used in the  
438 analysis.

439 **Cylinder design and printing:** Seven cylinders were designed to have progressively larger  
440 inertias that were integer multiples of the yaw inertia of fruit flies ( $5.2 \times 10^{-13}$  kg m<sup>2</sup> (Bender and  
441 Dickinson, 2006a)). To sample across a wide range of inertias and push the limit of flight  
442 performance, the cylinders were designed with logarithmically increasing yaw inertia (Table S5).  
443 The smallest cylinder had approximately the inertia of a single fly, whereas the inertia of the largest  
444 cylinder was around sixty-four times that of a fly. To ensure the inertia of cylinders closely matched

445 the desired value, we 3D printed the cylinders using a resin 3D printer with a tolerance of 25  $\mu\text{m}$   
446 (Formlabs Form 3+ SLA printer). The cylinders were printed using a clear resin that had a density  
447 of 1.12–1.15  $\text{g}/\text{cm}^3$ . Due to the limitation in printer resolution, the actual inertias of the printed  
448 cylinders were slightly larger than designed. However, the actual mass and inertia of all cylinders  
449 fell within 10% of the desired inertia. Larger inertias (128X) were printed but not used in this study  
450 as the magnetic tether system could no longer support the extra weight of these cylinders. To  
451 ensure the cylinders were not a significant source of damping due to air friction, we estimated the  
452 torque due to air friction at different angular velocities (See Supplementary Material). Our  
453 calculations indicate the torque due to air friction is roughly two orders of magnitude smaller than  
454 the torque required to overcome yaw damping (Figure S8), thus providing assurance that air friction  
455 of the cylinders was not a significant source of damping.

456 **Stimuli and experimental setup:** Using a virtual reality arena, we presented magnetically tethered  
457 flies with a visual stimulus (moving background) that elicited an optomotor response. The  
458 background consisted of uniformly spaced bars with a spatial wavelength of  $22.5^\circ$  subtending onto  
459 the fly eye. To test the impact of increasing yaw inertia on flight performance, we presented  
460 magnetically tethered flies with a visual sum-of-sines stimulus (Figure 1). This stimulus was  
461 generated by adding nine sine signals with distinct frequencies that ranged from 0.35 Hz to 13.7  
462 Hz. Each component of this stimulus had a random phase and an amplitude normalized to a velocity  
463 of  $52^\circ \text{ s}^{-1}$ . This ensured the stimulus velocity did not saturate the visual and motor systems, as  
464 previously described (Cellini et al., 2022). Each trial lasted 20 seconds and was presented five  
465 times to each fly. A second set of experiments was conducted to measure the impact of increasing  
466 inertia on the yaw stability of flies in the presence of a static stimulus. Flies were presented with  
467 the same uniform background which was kept stationary for 10 second and underwent five trials.  
468 Flies that did not complete more than three trials or had a low wingbeat amplitude (less than  $100^\circ$ )  
469 were not used in the analysis. Changes in heading of the flies were measured using a bottom view  
470 camera (Basler acA640–750um) recording at 80–100 frames per second (fps). Wing data was  
471 collected by measuring the wingbeat amplitude (extreme position at downstroke-to-upstroke  
472 reversal) using a modified version of Kinefly (Suver et al., 2016). To enable accurate measurements  
473 of wingbeat amplitude, the bottom view videos were registered with respect to the fly's reference  
474 frame prior to tracking the wings.

475 **Tracking in the magnetic tether:** The head and body motion were tracked using a custom  
476 MATLAB code that has been previously described (Cellini et al., 2022). The amplitudes of both  
477 wings were estimated by measuring the angle the edge of the wing blur made with the axis of the  
478 fly's body. Estimates of the wingbeat amplitude were measured using a modified version of Kenifly  
479 (Suver et al., 2016). Prior to measurement of wing and head kinematics, videos were registered to  
480 eliminate the yaw motion of the body, as done previously (Cellini et al., 2022).

481 **Flight performance metric:** The impact of adding inertia was measured using multiple  
482 performance metrics commonly used in the system identification of engineering systems. The  
483 system identification analysis was conducted using MATLAB, and each metric was estimated for  
484 individual flies and then averaged out across all flies to determine the grand mean for each inertia  
485 treatment. The gain was calculated by dividing the FFT magnitude of the fly's heading (output) with  
486 that of the visual stimulus (input). The phase difference was estimated by subtracting the output's  
487 phase from that of the input. The coherence was estimated using the MATLAB built-in function  
488 *mscohere*. Finally, we used the compensation error as an overall metric to measure changes in  
489 performance (Roth et al., 2011). The compensation error is a metric that combines gain and phase  
490 to indicate how well flies compensate for a moving background. A gain of unity and a phase  
491 difference of zero produce zero compensation error and indicate perfect tracking. The  
492 compensation error is calculated by finding the vector distance in the complex plane (norm)  
493 between the actual tracking performance  $H$  and the perfect tracking  $Z_0$  and can be expressed as

$$\varepsilon = \|H - Z_0\| \quad \text{Eq. 7}$$

494 Therefore, a compensation error of 0 indicates that flies perfectly compensated for the visual  
495 stimulus, a compensation error between zero and one indicate imperfect compensation, and values  
496 greater than one indicate that the system can a better job at stabilizing the input by effectively not  
497 responding. To avoid phase wrapping, the averaged phase difference was calculated using the  
498 circular statistics toolbox in MATLAB (Berens, 2009).

499  
500 **Transfer function fitting and system identification:** The magnetic tether restricts the body  
501 motion of fruit flies to rotation about the axis of the pin (yaw axis). Therefore, we can approximate  
502 the yaw dynamics using the following equation

$$I_t \dot{\omega} = -C \omega + \tau \quad \text{Eq. 8}$$

503 where  $I_t$  is the total yaw inertia of the fly (body inertia plus cylinder inertia),  $C$  is the yaw damping  
504 coefficient,  $\tau$  is the torque generated by the wings, and  $\omega$  is yaw angular velocity of the fly (Cellini  
505 et al., 2022; Salem et al., 2022). Transfer function fitting was performed using a custom designed  
506 MATLAB code and the method is detailed elsewhere (Roth et al., 2012). In short, we fit the  
507 error/output data to a first order transfer function in [Equation 2](#).

508 We did not fit the value of the inertia, rather we assumed a constant value for each group (total  
509 inertia = fly inertia + inertia of cylinder). These parameters were estimated using a least square  
510 estimate as described in a previous study (Roth et al., 2012). Only fits with a at least 65% goodness  
511 of fit (GoF) were used in the transfer function fitting and parameter estimation. The GoF was at  
512 least 84 % for all groups and detailed estimate for each inertia treatment is in [Table S6 and Figure](#)  
513 [S4B](#). The FRF obtained from flies with an added inertia of sixty-four times was not used in transfer  
514 function fitting due to the low overall coherence of the response.

515  
516 **Flapping-counter torque estimates:** In this study, we found that flies modulated yaw damping in  
517 response to changes in inertia to maintain performance. However, it was not clear if damping is  
518 actively modulated using neural control, or a byproduct of changes in wing kinematics aimed at  
519 elevating torque production. To determine the nature of this change, we estimated the flapping  
520 counter-torque (FCT), which is a passively generated torque in flapping flight that is produced  
521 during turns (Cheng et al., 2010). In the magnetic tether, the FCT counter-acts rotations about the  
522 yaw axis, thus, it can be thought of as viscous damping about the yaw axis proportional to yaw  
523 angular velocity. The method for estimating FCT has been described previously (Salem et al.,  
524 2022). Briefly, we estimated the stroke angle of flies by multiplying the base stroke angle from free  
525 flight data (Muijres et al., 2017a) with a correction factor, which was then projected onto the stroke  
526 plane. For rotation angles, we used the intact baseline rotation angles measured in free flight  
527 (Muijres et al., 2017a). A comprehensive derivation of the FCT equations can be found in (Cheng  
528 et al., 2010). The wing morphological parameters required to calculate the FCT were estimated  
529 using images of wings taken under a microscope and analyzed using a custom MATLAB code. To  
530 estimate how changes in wing kinematics altered the FCT, we estimated the FCT for a flapping  
531 frequency ranging from 200 Hz to 1000 Hz. We also modified the rotation angle by multiplying the  
532 baseline rotation angle for both wings with a scaling factor. The passive damping was then  
533 estimated for different combinations of flapping frequency and rotation angles ([Figure 4D](#)). This  
534 allowed us to determine if changes in wing kinematics could produce a large enough yaw damping  
535 from the FCT model alone.

536 **Saccade detection and analysis:** In this study, we only estimated the dynamics of spontaneous  
537 saccades. Unlike reset and catch-up saccades which are triggered by an external visual stimulus  
538 (Cellini and Mongeau, 2020b; Cellini et al., 2021; Mongeau and Frye, 2017; Mronz and Lehmann,  
539 2008), spontaneous saccades are internally triggered (Censi et al., 2013). Hence, we only used  
540 saccade data generated from our static background experiments. Saccade detection was  
541 accomplished by using methods previously described (Mongeau and Frye, 2017). Magnetically  
542 tethered flies began to oscillate about the pin's axis when yaw inertia was increased by more than  
543 8X, which complicated automatic saccade detection as the dynamics of the oscillations were close  
544 to the dynamics of saccades. To ensure no false saccades were included, we designed custom

545 code (MATLAB) which flagged saccades with a displacement smaller than  $10^\circ$  and with a duration  
546 smaller than 50 ms. We manually verified and removed flagged saccades to confirm their identity  
547 via a custom graphical user interface. Further complicating the comparison of saccade dynamics  
548 was the large sample size ( $>100$  saccades per group), thus a tiny difference in saccade dynamics  
549 produces small  $p$  values. Therefore, a comparison may yield a statistically significant, but not a  
550 biologically relevant difference. To address this issue, we computed Hedge's  $g$ , which presents a  
551 metric of effect size independent of sample size (Hedges, 1981). This allowed us to properly  
552 compare changes in saccade dynamics of the inertia added flies to that of the unaltered group.

553 **Statistics and comparison:** For all box plots, the central line is the median, the bottom and top  
554 edges of the box are the 25th and 75th percentiles and the whiskers and extend to  $\pm 2.7$  standard  
555 deviations. Unless otherwise specified, we report means  $\pm 1$  standard deviation. Significant  
556 differences are stated as  $*p \leq 0.05$ ,  $**p \leq 0.01$ ,  $***p \leq 0.001$ . Unless otherwise noted, saccade  
557 dynamics were compared using the effect-size model Hedge's  $g$ .

558

#### 559 **Conflict of interest declaration**

560

561 The authors declare no competing interest.

562

#### 563 **Author Contributions**

564 W.S. and J.M.M. designed research; W.S. and E.J. performed research; B.C. contributed new  
565 analytic tools; W.S. and B.C. analyzed data; and W.S. and J.M.M. wrote the paper.

#### 566 **Funding**

567

568 This material is based upon work supported by the Air Force Office of Scientific Research  
569 (FA9550-20-1-0084) and an Alfred P. Sloan Research Fellowship (FG-2021-16388) to J.-M.M.

570

#### 571 **Data availability statement**

572

573 All code and data will be made available on Penn State ScholarSphere.

574 **References**

575

576 **Aström, K. J. and Murray, R. M.** (2010). *Feedback Systems: An Introduction for Scientists and*  
577 *Engineers*. Princeton University Press.

578 **Åström, K. J. and Wittenmark, B.** (2008). *Adaptive Control*. 2nd ed. Dover Publications.

579 **Bender, J. A. and Dickinson, M. H.** (2006a). Visual stimulation of saccades in magnetically  
580 tethered *Drosophila*. *J. Exp. Biol.* **209**, 3170–82.

581 **Bender, J. A. and Dickinson, M. H.** (2006b). A comparison of visual and haltere-mediated  
582 feedback in the control of body saccades in *Drosophila melanogaster*. *J. Exp. Biol.* **209**,  
583 4597–4606.

584 **Berens, P.** (2009). CircStat : A MATLAB Toolbox for Circular Statistics. *J. Stat. Softw.* **31**,.

585 **Bergou, A. J., Ristroph, L., Guckenheimer, J., Cohen, I. and Wang, Z. J.** (2010). Fruit Flies  
586 Modulate Passive Wing Pitching to Generate In-Flight Turns. *Phys. Rev. Lett.* **104**, 148101.

587 **Cellini, B. and Mongeau, J.-M.** (2020a). Active vision shapes and coordinates flight motor  
588 responses in flies. *Proc. Natl. Acad. Sci. U. S. A.* **117**, 23085–23095.

589 **Cellini, B. and Mongeau, J.-M.** (2020b). Hybrid visual control in fly flight: insights into gaze shift  
590 via saccades. *Curr. Opin. Insect Sci.* **42**, 23–31.

591 **Cellini, B., Salem, W. and Mongeau, J.-M.** (2021). Mechanisms of punctuated vision in fly flight.  
592 *Curr. Biol.* **31**, 4009-4024.e3.

593 **Cellini, B., Salem, W. and Mongeau, J.-M.** (2022). Complementary feedback control enables  
594 effective gaze stabilization in animals. *Proc. Natl. Acad. Sci.* **119**,.

595 **Censi, A., Straw, A. D., Sayaman, R. W., Murray, R. M. and Dickinson, M. H.** (2013).  
596 Discriminating External and Internal Causes for Heading Changes in Freely Flying  
597 *Drosophila*. *PLoS Comput. Biol.* **9**, e1002891.

598 **Cheng, B., Fry, S. N., Huang, Q. and Deng, X.** (2010). Aerodynamic damping during rapid flight  
599 maneuvers in the fruit fly *Drosophila*. *J. Exp. Biol.* **213**, 602–612.

600 **Combes, S. A., Gagliardi, S. F., Switzer, C. M. and Dillon, M. E.** (2020). Kinematic flexibility  
601 allows bumblebees to increase energetic efficiency when carrying heavy loads. *Sci. Adv.* **6**,.

602 **Dickinson, M. H.** (1999). Haltere-mediated equilibrium reflexes of the fruit fly, *Drosophila*  
603 *melanogaster*.

604 **Dickson, W. B., Polidoro, P., Tanner, M. M. and Dickinson, M. H.** (2010). A linear systems  
605 analysis of the yaw dynamics of a dynamically scaled insect model. *J. Exp. Biol.* **213**, 3047–  
606 3061.

607 **Elzinga, M. J., Dickson, W. B. and Dickinson, M. H.** (2012). The influence of sensory delay on  
608 the yaw dynamics of a flapping insect. *J. R. Soc. Interface* **9**, 1685–1696.

609 **Fuller, S. B., Straw, A. D., Peek, M. Y., Murray, R. M. and Dickinson, M. H.** (2014). Flying  
610 *Drosophila* stabilize their vision-based velocity controller by sensing wind with their

- 611 antennae. *Proc. Natl. Acad. Sci.* **111**, E1182–E1191.
- 612 **Hedges, L. V.** (1981). Distribution Theory for Glass's Estimator of Effect size and Related  
613 Estimators. *J. Educ. Stat.* **6**, 107–128.
- 614 **Hedrick, T. L., Cheng, B. and Deng, X.** (2009). Wingbeat time and the scaling of passive  
615 rotational damping in flapping flight. *Science* **324**, 252–5.
- 616 **Jindrich, D. L. and Full, R. J.** (2002). Dynamic stabilization of rapid hexapedal locomotion. *J.*  
617 *Exp. Biol.* **205**, 2803–2823.
- 618 **Kelley, K. and Preacher, K. J.** (2012). On effect size. *Psychol. Methods* **17**, 137–152.
- 619 **Land, M. F. and Collett, T. S.** (1974). Chasing behaviour of houseflies (*Fannia canicularis*). *J.*  
620 *Comp. Physiol.* **89**, 331–357.
- 621 **Lee, D. V., Walter, R. M., Deban, S. M. and Carrier, D. R.** (2001). Influence of increased  
622 rotational inertia on the turning performance of humans. *J. Exp. Biol.* **204**, 3927–3934.
- 623 **Mongeau, J. M. and Frye, M. A.** (2017). *Drosophila* Spatiotemporally Integrates Visual Signals to  
624 Control Saccades. *Curr. Biol.* **27**, 2901-2914.e2.
- 625 **Mountcastle, A. M., Ravi, S. and Combes, S. A.** (2015). Nectar vs. Pollen loading affects the  
626 tradeoff between flight stability and maneuverability in bumblebees. *Proc. Natl. Acad. Sci. U.*  
627 *S. A.* **112**, 10527–10532.
- 628 **Mronz, M. and Lehmann, F. O.** (2008). The free-flight response of *Drosophila* to motion of the  
629 visual environment. *J. Exp. Biol.* **211**, 2026–2045.
- 630 **Muijres, F. T., Elzinga, M. J., Iwasaki, N. A. and Dickinson, M. H.** (2015). Body saccades of  
631 *Drosophila* consist of stereotyped banked turns. *J. Exp. Biol.* **218**, 864–75.
- 632 **Muijres, F. T., Iwasaki, N. A., Elzinga, M. J., Melis, J. M. and Dickinson, M. H.** (2017a). Flies  
633 compensate for unilateral wing damage through modular adjustments of wing and body  
634 kinematics. *Interface Focus* **7**, 20160103.
- 635 **Muijres, F. T., Chang, S. W., van Veen, W. G., Spitzen, J., Biemans, B. T., Koehl, M. A. R.**  
636 **and Dudley, R.** (2017b). Escaping blood-fed malaria mosquitoes minimize tactile detection  
637 without compromising on take-off speed. *J. Exp. Biol.* **220**, 3751–3762.
- 638 **Reiser, M. B. and Dickinson, M. H.** (2008). A modular display system for insect behavioral  
639 neuroscience. *J. Neurosci. Methods* **167**, 127–39.
- 640 **Revzen, S., Burden, S. a., Moore, T. Y., Mongeau, J. M. and Full, R. J.** (2013). Instantaneous  
641 kinematic phase reflects neuromechanical response to lateral perturbations of running  
642 cockroaches. *Biol. Cybern.* **107**, 179–200.
- 643 **Ristroph, L., Bergou, A. J., Ristroph, G., Coumes, K., Berman, G. J., Guckenheimer, J.,**  
644 **Wang, Z. J. and Cohen, I.** (2010). Discovering the flight autostabilizer of fruit flies by  
645 inducing aerial stumbles. *Proc. Natl. Acad. Sci.* **107**, 4820–4824.
- 646 **Ristroph, L., Ristroph, G., Morozova, S., Bergou, A. J., Chang, S., Guckenheimer, J., Wang,**  
647 **Z. J. and Cohen, I.** (2013). Active and passive stabilization of body pitch in insect flight. *J.*

- 648 *R. Soc. Interface* **10**, 20130237.
- 649 **Roth, E., Zhuang, K., Stamper, S. A., Fortune, E. S. and Cowan, N. J.** (2011). Stimulus  
650 predictability mediates a switch in locomotor smooth pursuit performance for *Eigenmannia*  
651 *virescens*. *J. Exp. Biol.* **214**, 1170–1180.
- 652 **Roth, E., Reiser, M. B., Dickinson, M. H. and Cowan, N. J.** (2012). A task-level model for  
653 optomotor yaw regulation in *Drosophila melanogaster*: A frequency-domain system  
654 identification approach. In *2012 IEEE 51st IEEE Conference on Decision and Control*  
655 (CDC), pp. 3721–3726. IEEE.
- 656 **Salem, W., Cellini, B., Frye, M. A. and Mongeau, J.-M.** (2020). Fly eyes are not still: a motion  
657 illusion in *Drosophila* flight supports parallel visual processing. *J. Exp. Biol.* **223**, jeb212316.
- 658 **Salem, W., Cellini, B., Kabutz, H., Hari Prasad, H. K., Cheng, B., Jayaram, K. and Mongeau,**  
659 **J.-M.** (2022). Flies trade off stability and performance via adaptive compensation to wing  
660 damage. *Sci. Adv.* **8**.
- 661 **Sherman, A. and Dickinson, M. H.** (2004). Summation of visual and mechanosensory feedback  
662 in *Drosophila* flight control. *J. Exp. Biol.* **207**, 133–42.
- 663 **Sponberg, S., Dyhr, J. P., Hall, R. W. and Daniel, T. L.** (2015). Luminance-dependent visual  
664 processing enables moth flight in low light. *Science (80-. )*. **348**, 1245–1248.
- 665 **Suver, M. P., Huda, A., Iwasaki, N., Safarik, S. and Dickinson, M. H.** (2016). An Array of  
666 Descending Visual Interneurons Encoding Self-Motion in *Drosophila*. *J. Neurosci.* **36**,  
667 11768–11780.
- 668 **Tammero, L. F. and Dickinson, M. H.** (2002). Collision-avoidance and landing responses are  
669 mediated by separate pathways in the fruit fly, *Drosophila melanogaster*. *J. Exp. Biol.* **205**,  
670 2785–2798.
- 671 **van Veen, W. G., van Leeuwen, J. L. and Muijres, F. T.** (2020). Malaria mosquitoes use leg  
672 push-off forces to control body pitch during take-off. *J. Exp. Zool. Part A, Ecol. Integr.*  
673 *Physiol.* **333**, 38–49.
- 674 **Yang, C. S., Cowan, N. J. and Haith, A. M.** (2021). De novo learning versus adaptation of  
675 continuous control in a manual tracking task. *Elife* **10**, 38–49.
- 676



677 **Figures and Tables**

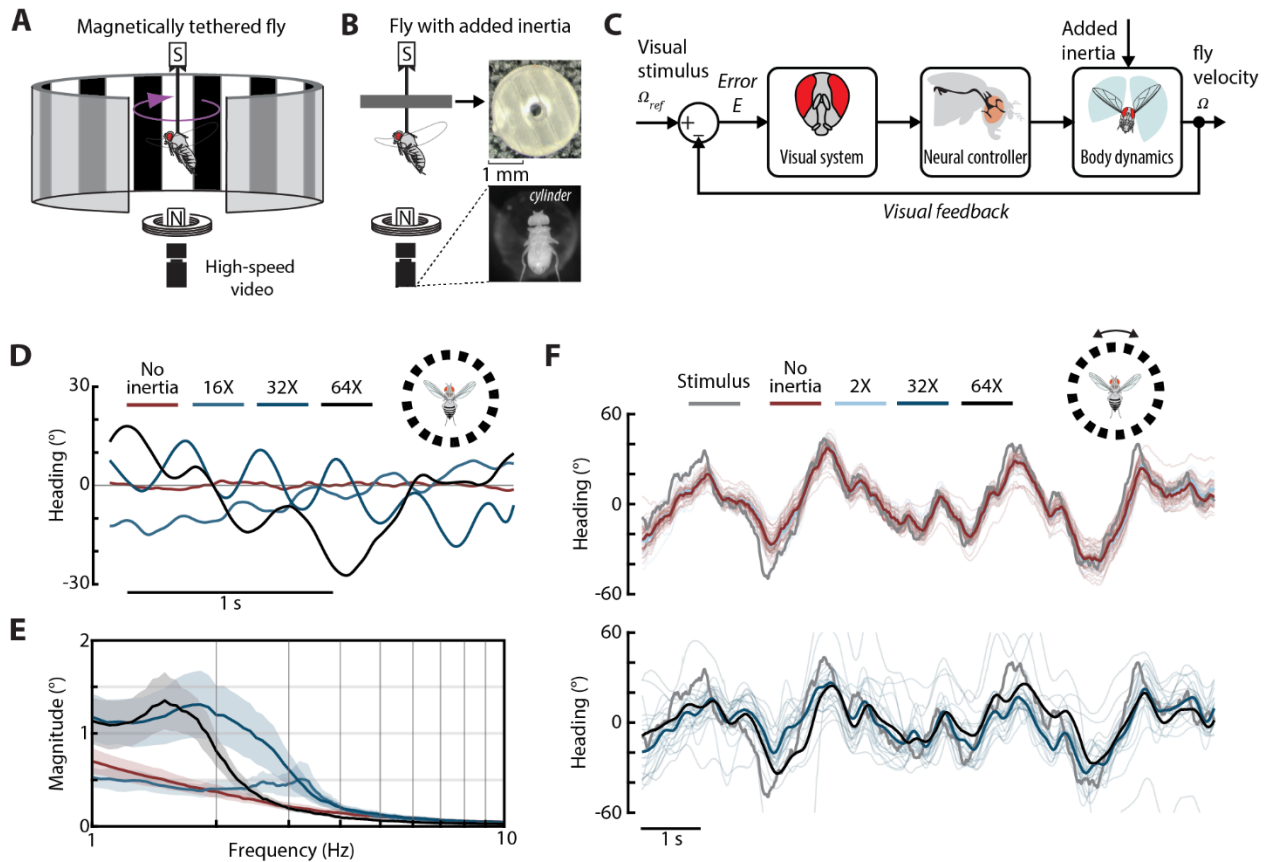

678  
679

680 **Figure 1. Experimental setup and paradigm to test the impact of increasing yaw inertia on**  
 681 **the performance and stability of fly flight. A)** The magnetic tether system and virtual reality  
 682 arena. The flies were glued to a magnetic pin and suspended between two magnets inside the  
 683 virtual reality arena. This configuration enabled rotation about the yaw axis while restricting motion  
 684 in other directions. Changes in the fly's heading were recorded using a bottom view high-speed  
 685 camera. **B)** An illustration of a magnetically tethered fly with a cylinder glued onto the magnetic pin  
 686 (left). The cylinders (top right) were 3D printed and mounted onto the magnetic pins to increase  
 687 yaw inertia (bottom right). **C)** The proposed control framework used to model the optomotor  
 688 response of magnetically tethered flies. **D)** Sample data of individual flies presented a static visual  
 689 stimulus with different added inertia. **E)** Magnitude plot showing the average frequency and  
 690 amplitude of the oscillations. **F)** The visual sum-of-sines stimulus (grey) along with the individual fly  
 691 response (thin lines) and the mean response across all individuals (solid lines) for select amounts  
 692 of added inertia. For **E**, shaded region is  $\pm 1$  STD. No added inertia  $n = 13$  flies; 16X:  $n = 7$  flies;  
 693 32X:  $n = 9$  flies; 64X:  $n = 13$  flies. For **F**, no added inertia:  $n = 41$  flies; 2X:  $n = 14$  flies; 32X:  $n = 17$   
 694 flies; 64X:  $n = 8$  flies.  
 695

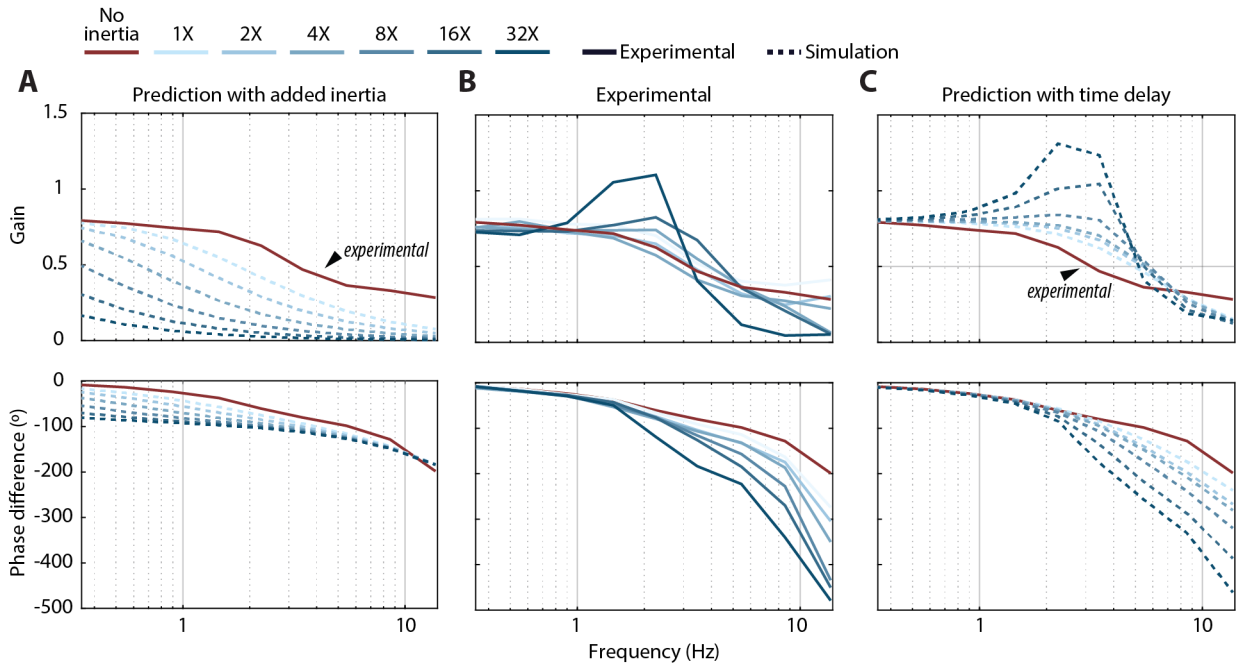

696  
697  
698  
699  
700  
701  
702  
703  
704  
705  
706

**Figure 2. Flies maintained similar performance at the expense of increased response time to stabilize gaze. A)** The average experimental closed-loop response with no added inertia (red line) versus the simulated response to additional yaw inertia (dashed lines). **B)** The empirical frequency response function of flies with added inertia in response to a sum-of-sines stimulus. Addition of inertia had a significant influence on the phase difference and gain for frequencies greater than  $\sim 0.9$  Hz (see [Table S1](#) for exact values and statistics). **C)** Simulated frequency response functions for a no-added-inertia fly with increasing time delay. For **A and C**, dashed lines are from simulation and solid lines are the experimental results. Plots with  $\pm 1$  STD are shown in [Figure S2](#). No inertia added:  $n = 41$  flies; 1X:  $n = 11$  flies; 2X:  $n = 15$  flies; 4X:  $n = 19$  flies; 8X:  $n = 17$  flies; 16X:  $n = 17$  flies; 32X:  $n = 8$  flies.

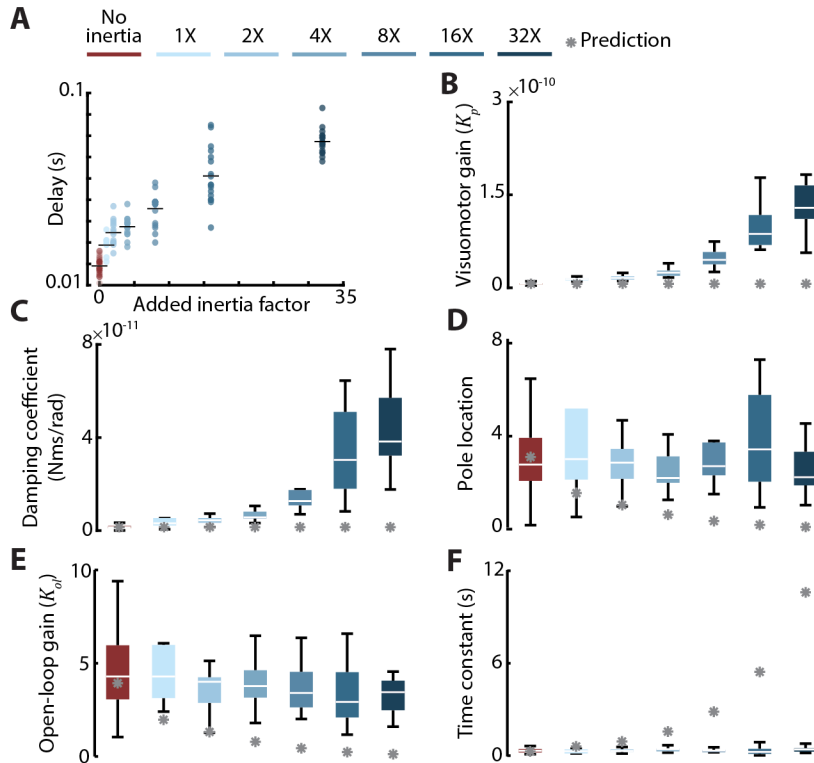

707  
708  
709  
710  
711  
712  
713  
714  
715  
716  
717  
718  
719  
720  
721

**Figure 3. Flies increased visuomotor gain and yaw damping to maintain stability.** **A)** Estimate of the time delay for intact flies and flies with added inertia. Increasing inertia caused the time delay to increase. This increase was proportional to the amount of added inertia (ANOVA; DOF = 6;  $p < 0.001$ ). Horizontal line: average. **B)** The predicted (grey asterisk) and estimated visuomotor gain. In response to increases in inertia, flies modulated their visuomotor gain (ANOVA, DOF = 6;  $p < 0.001$ ). **C)** The estimated active damping. Flies actively modulated their yaw damping (ANOVA; DOF=6;  $p < 0.001$ ). **D)** Pole location of flies with different added inertia. The overall pole location of fruit flies changed marginally (ANOVA; DOF = 6;  $p = 0.04$ ). **E)** The open-loop gain ( $K_{ol}$ ) and **F)** the system time constant ( $\tau_f$ ). Flies maintained the same open-loop gain and time constants. ANOVA, DOF = 6,  $p = 0.53$  &  $p = 0.94$ , respectively. For all panels: No inertia added:  $n = 41$  flies; 1X:  $n = 11$  flies; 2X:  $n = 15$  flies; 4X:  $n = 19$  flies; 8X:  $n = 17$  flies; 16X:  $n = 17$  flies; 32X:  $n = 8$  flies. Further details on goodness of fit and pole locations can be found in [Figure S4](#). For **B–F**: Grey asterisks are the prediction from unaltered fly model parameters (Eq. 3) with inertia as the only parameter change.

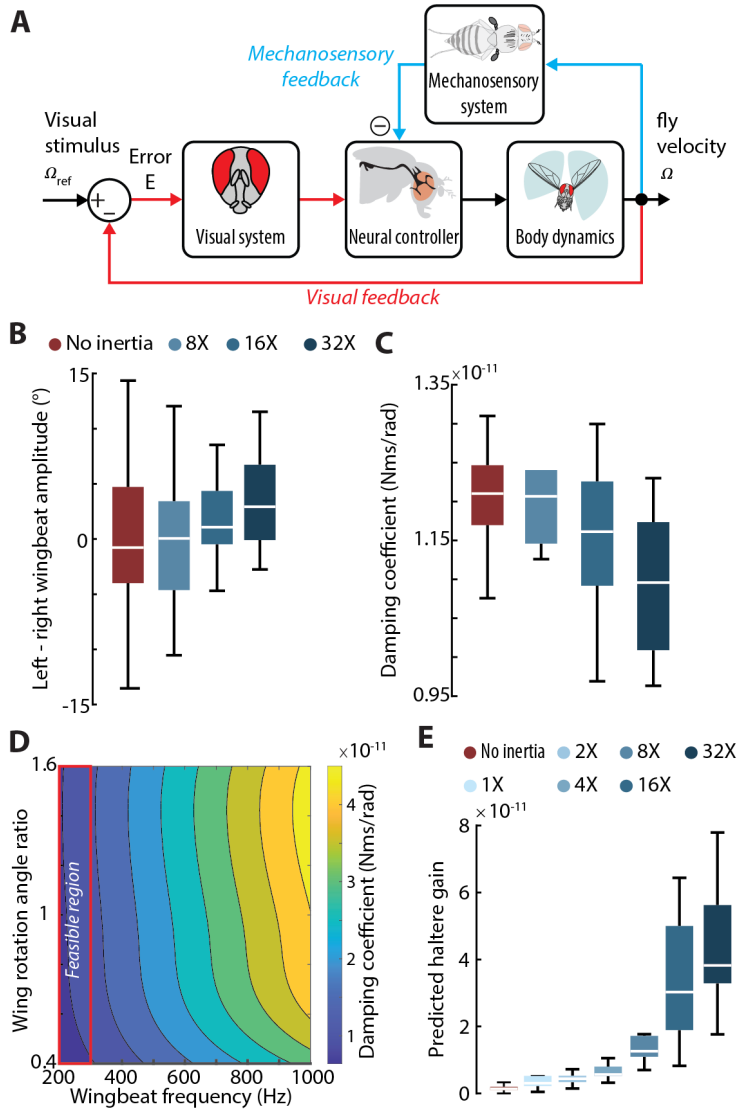

722

723 **Figure 4. Proposed mechanism for regulating yaw damping.** **A)** The proposed control  
 724 architecture to modulate damping and maintain the same stability. Using the nested  
 725 mechanosensory feedback loop, flies could alter yaw damping by regulating the gain from the  
 726 haltere feedback. **B)** The impact of increasing inertia on the difference in wingbeat amplitude  
 727 (DWBA). Changes in inertia caused no significant changes in DWBA (ANOVA, DOF = 3,  $p = 0.28$ ).  
 728 **C)** Estimates of the passive damping using a model flapping counter-torque. The model predicted  
 729 marginal changes in the FCT damping coefficient based on the 2D wing kinematics. **D)** Changes  
 730 in the FCT as a function of changes in the flapping frequency and magnitude of the wing rotation  
 731 angle ratio. The magnitude of the rotation angle was modified by multiplying the intact-wing rotation  
 732 angle with a scaling factor, whereas the frequency was varied from 200 Hz to a 1000 Hz. Red  
 733 rectangle: region in which flies can feasibly modulate flapping frequency. **E)** Estimated changes in  
 734 haltere feedback gain in response to changes in inertia. For **B,C, & E:** No inertia added:  $n = 41$   
 735 flies; 1X:  $n = 11$  flies; 2X:  $n = 15$  flies; 4X:  $n = 19$  flies; 8X:  $n = 17$  flies; 16X:  $n = 17$  flies; 32X:  $n = 8$   
 736 flies.

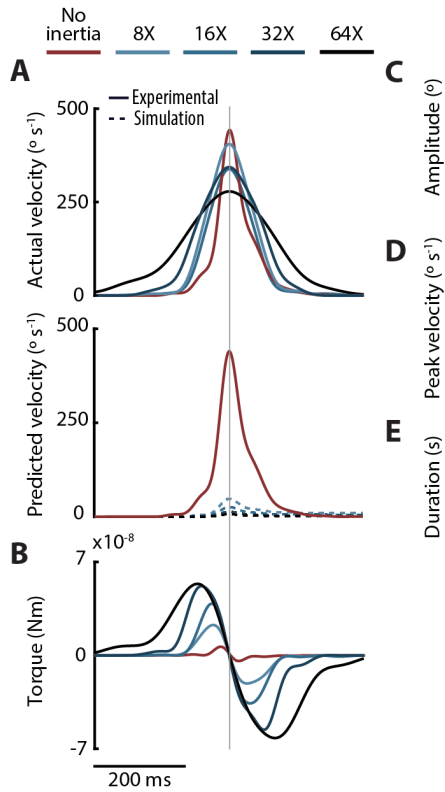

737

738 **Figure 5. Flies adaptively control saccades.** **A)** The average velocity profile of saccades for flies  
739 with no or added inertia (top panel), and the predicted saccade velocity profiles estimated using  
740 simulation (bottom panel, dashed lines). **B)** Torque profile of flies with added inertia. As more inertia  
741 is added, flies produce more torque over a larger duration of time. **C)** Saccade displacement, **D)**  
742 peak velocity, **E)** and duration for flies. Adding inertia led to a slight increase in saccade  
743 displacement, a slight decrease in peak velocity, and a noticeable increase in saccade duration  
744 (Table S4). For **A,B**: Grey vertical line: peak velocity. **For all panels:** No added inertia:  $n = 301$   
745 saccades from 13 flies; 8X:  $n = 148$  saccades from 9 flies; 16X:  $n = 139$  saccades from 7 flies; 32X:  
746  $n = 89$  saccades from 9 flies; 64X:  $n = 118$  saccades from 13 flies. For saccade variation data see  
747 Figure S6.

## Supplementary Material

### Flies adaptively control flight to compensate for added inertia

Wael Salem, Benjamin Cellini‡, Eric Jaworski, Jean-Michel Mongeau\*

Department of Mechanical Engineering, The Pennsylvania State University, University Park, PA, USA

‡ Present address: Department of Mechanical Engineering, University of Nevada, Reno, NV, USA

\* Corresponding author

**Email:** [jmmongeau@psu.edu](mailto:jmmongeau@psu.edu)

**Estimate of rotating cylinder torque.** To estimate the friction torque on a rotating cylinder, we assumed a solid cylinder rotating at a constant velocity. We estimated the resulting friction torque for the different cylinder inertias with distinct geometry ([Table S5](#)). For each cylinder, we calculated the Reynolds number ( $Re$ ) for angular velocities  $\omega$  ranging from 10–300  $^{\circ}\text{s}^{-1}$  with a kinematic viscosity of air of  $1.57 \times 10^{-5} \text{ m}^2/\text{s}$ , which yielded a flow in a laminar regime. For a rotating cylinder in a laminar flow [1], the moment coefficient is given by

$$C_{mc} = \frac{8}{Re} \quad \text{Eq. 9}$$

Thus, the torque to overcome friction drag for a rotating cylinder is

$$T = 0.5\pi\rho\omega^2 a^4 L C_{mc} \quad \text{Eq. 10}$$

where  $\rho$  is the air density ( $1.225 \text{ kg/m}^3$ ),  $\omega$  is the angular velocity,  $a$  is the radius, and  $L$  is the length of the cylinder.

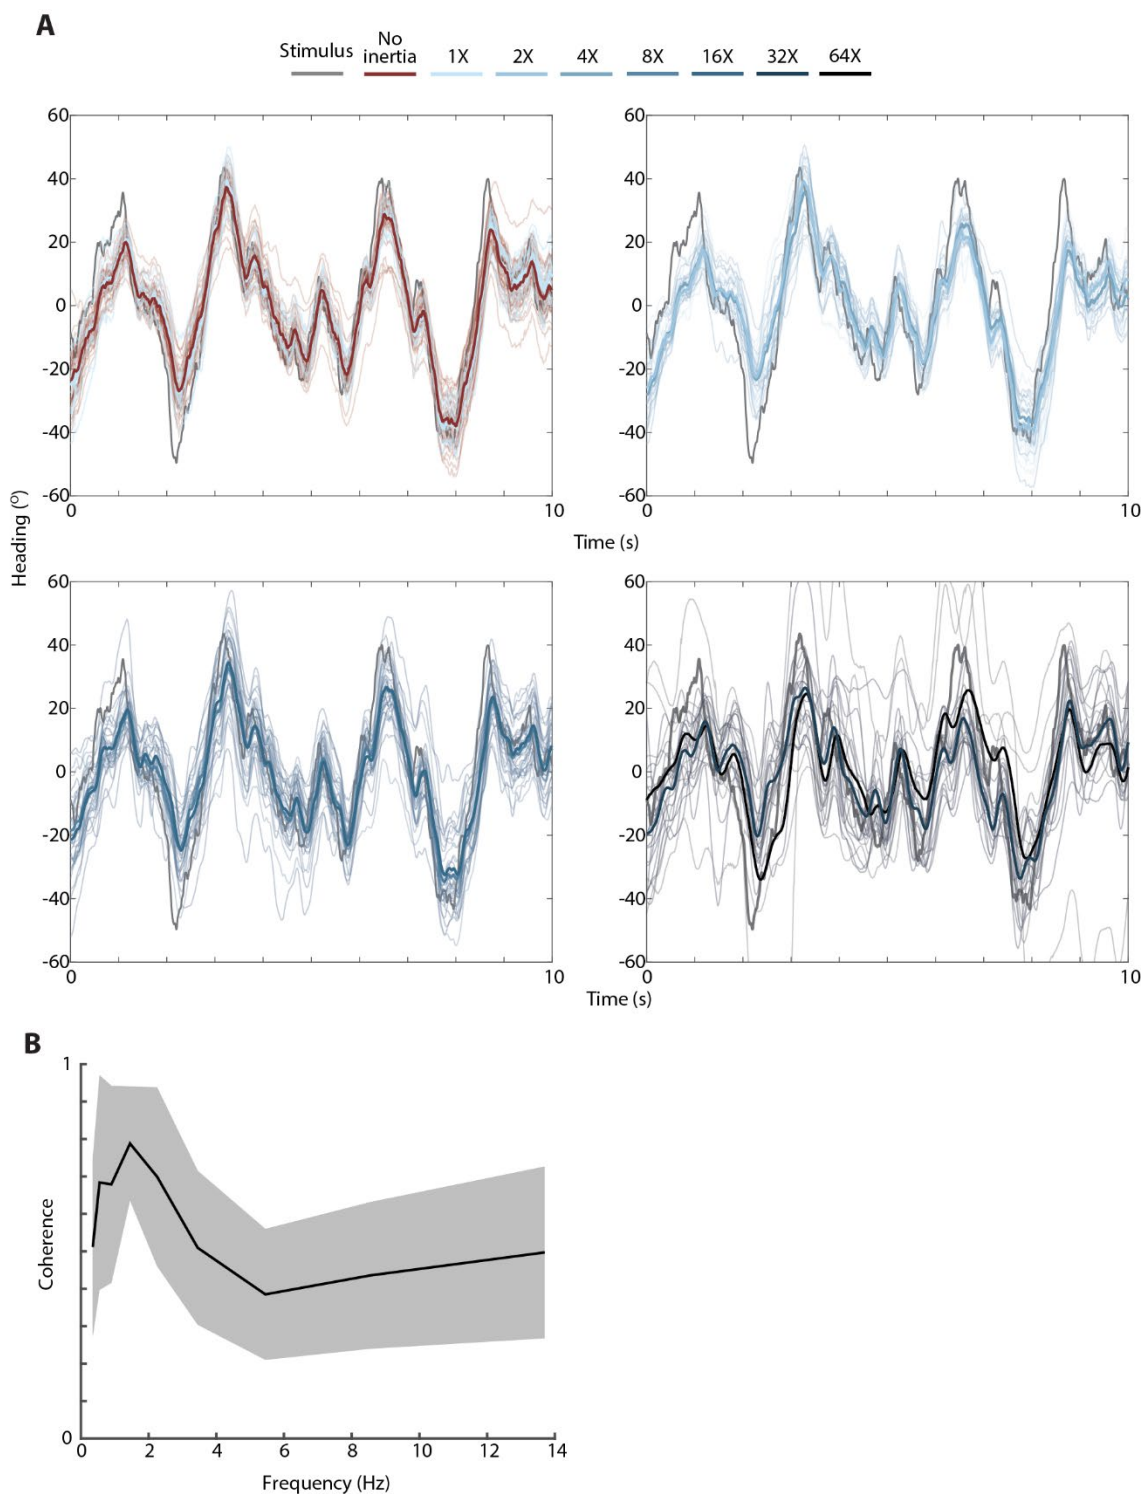

**Figure S1.** Individual and average response of flies with different amount of added inertia. A) Individual (light lines) and averaged response (solid lines) to a sum-of-sines stimulus. B) The average coherence of flies with 64X added inertia. No inertia added:  $n = 41$  flies; 1X:  $n = 11$  flies; 2X:  $n = 15$  flies; 4X:  $n = 19$  flies; 8X:  $n = 17$  flies; 16X:  $n = 17$  flies; 32X:  $n = 8$  flies. Shaded area:  $\pm 1$  STD.



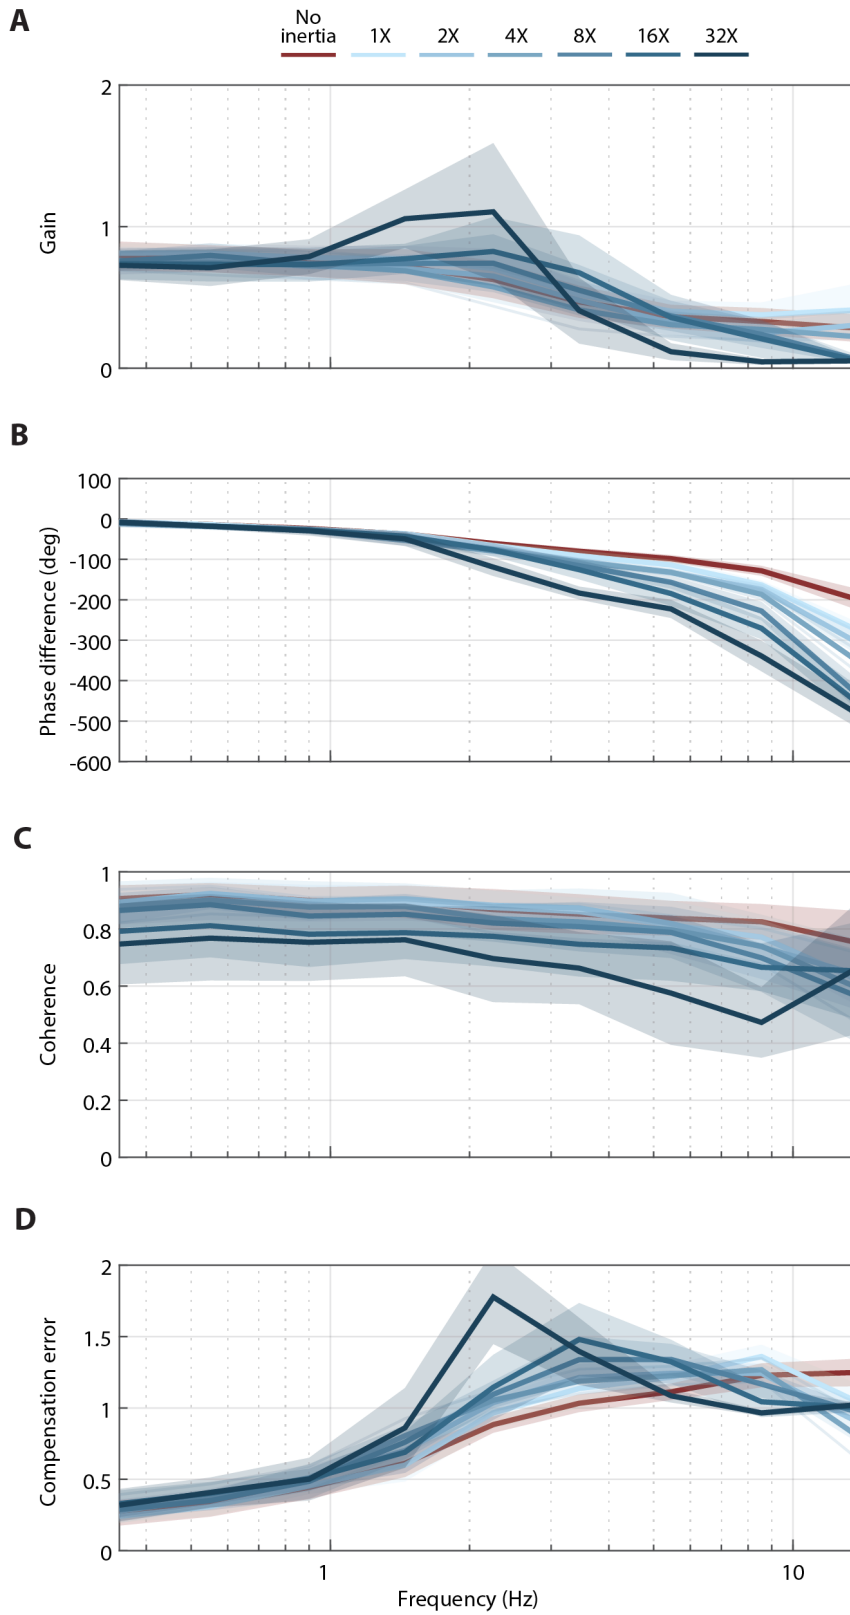

**Figure S2.** The average frequency domain response (solid lines) of flies with different amount of added inertia. A) Gain. B) Phase difference. C) Coherence. D) Compensation error. No inertia

added:  $n = 41$  flies; 1X:  $n = 11$  flies; 2X:  $n = 15$  flies; 4X:  $n = 19$  flies; 8X:  $n = 17$  flies; 16X:  $n = 17$  flies; 32X:  $n = 8$  flies. Shaded area:  $\pm 1$  STD.

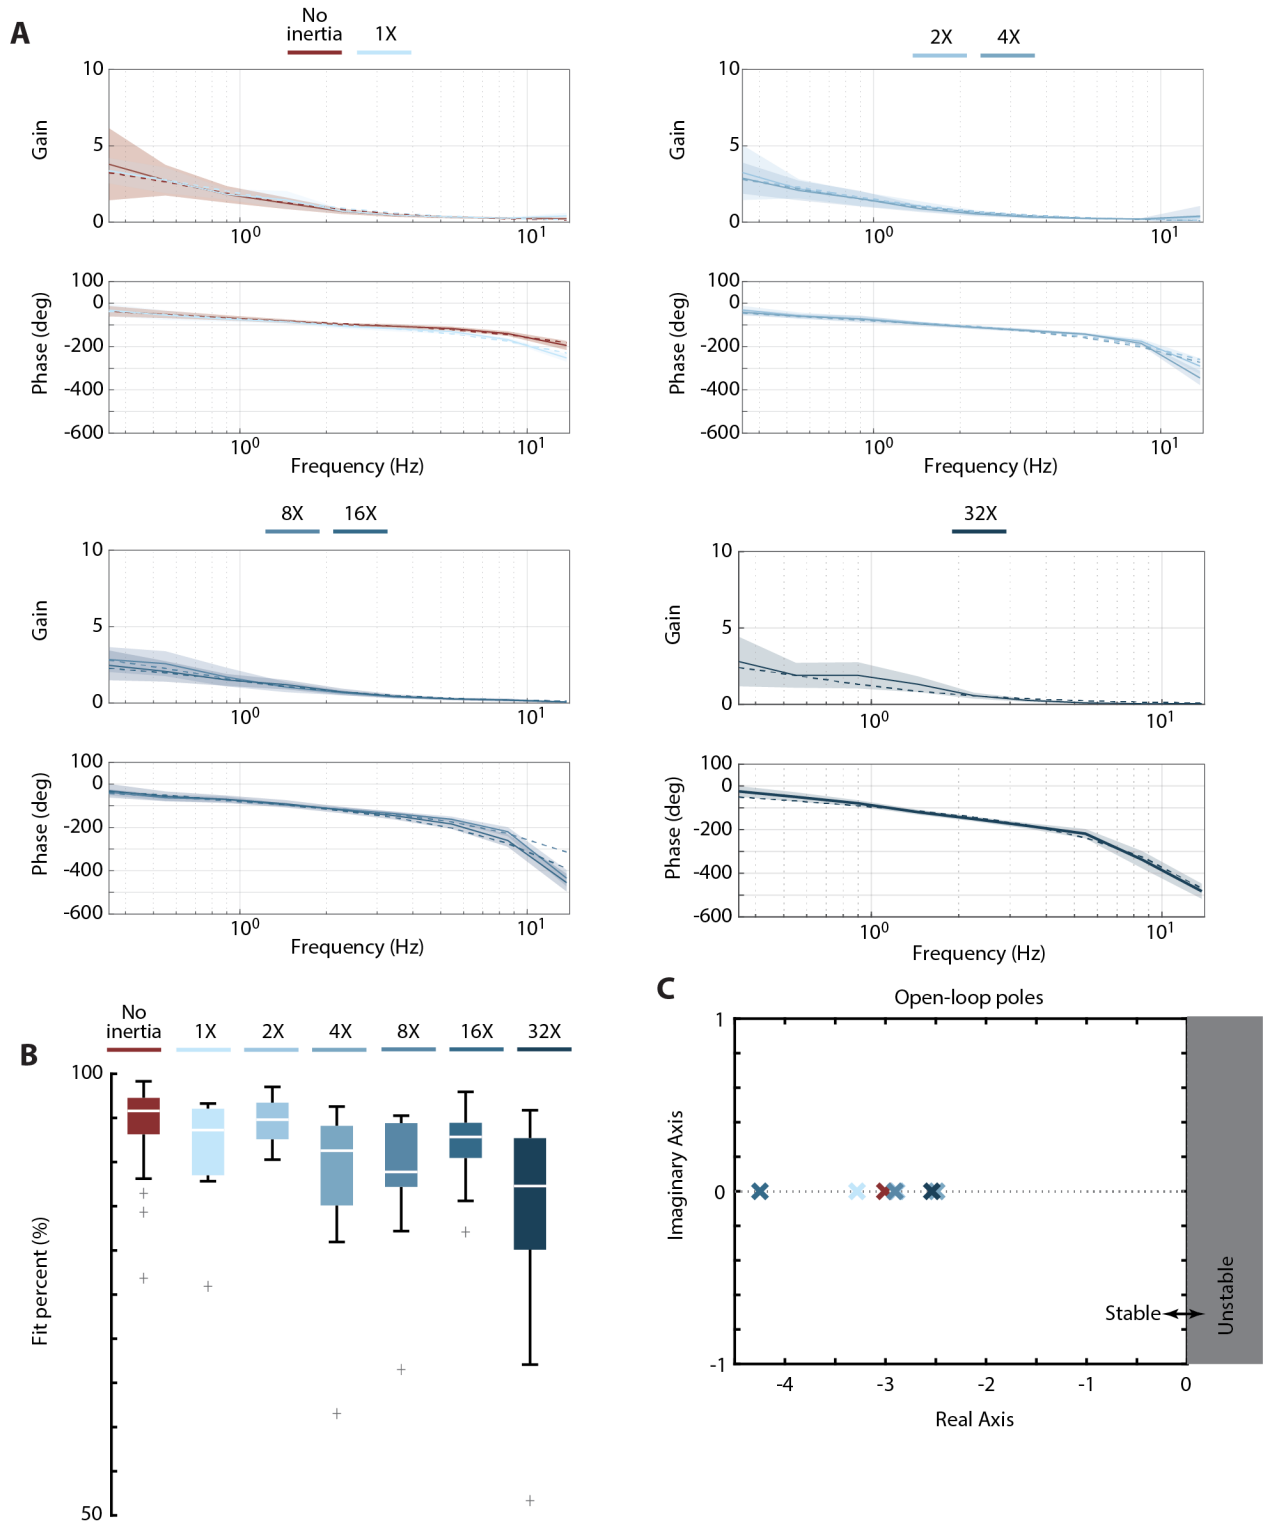

**Figure S3.** Open-loop Bode plots and best-fit transfer functions to experimental data. A) Open-loop Bode plots (solid lines) with the best-fit transfer function (dashed line). Shaded area:  $\pm 1$  STD. For visual clarity, two sets of inertia at most are shown on each plot. B) Fit percentage of each data set to the first-order transfer function  $G(s)$  (Eq. 2). C) Average pole location of the open-loop transfer

functions. No inertia added:  $n = 41$  flies; 1X:  $n = 11$  flies; 2X:  $n = 15$  flies; 4X:  $n = 19$  flies; 8X:  $n = 17$  flies; 16X:  $n = 17$  flies; 32X:  $n = 8$  flies.

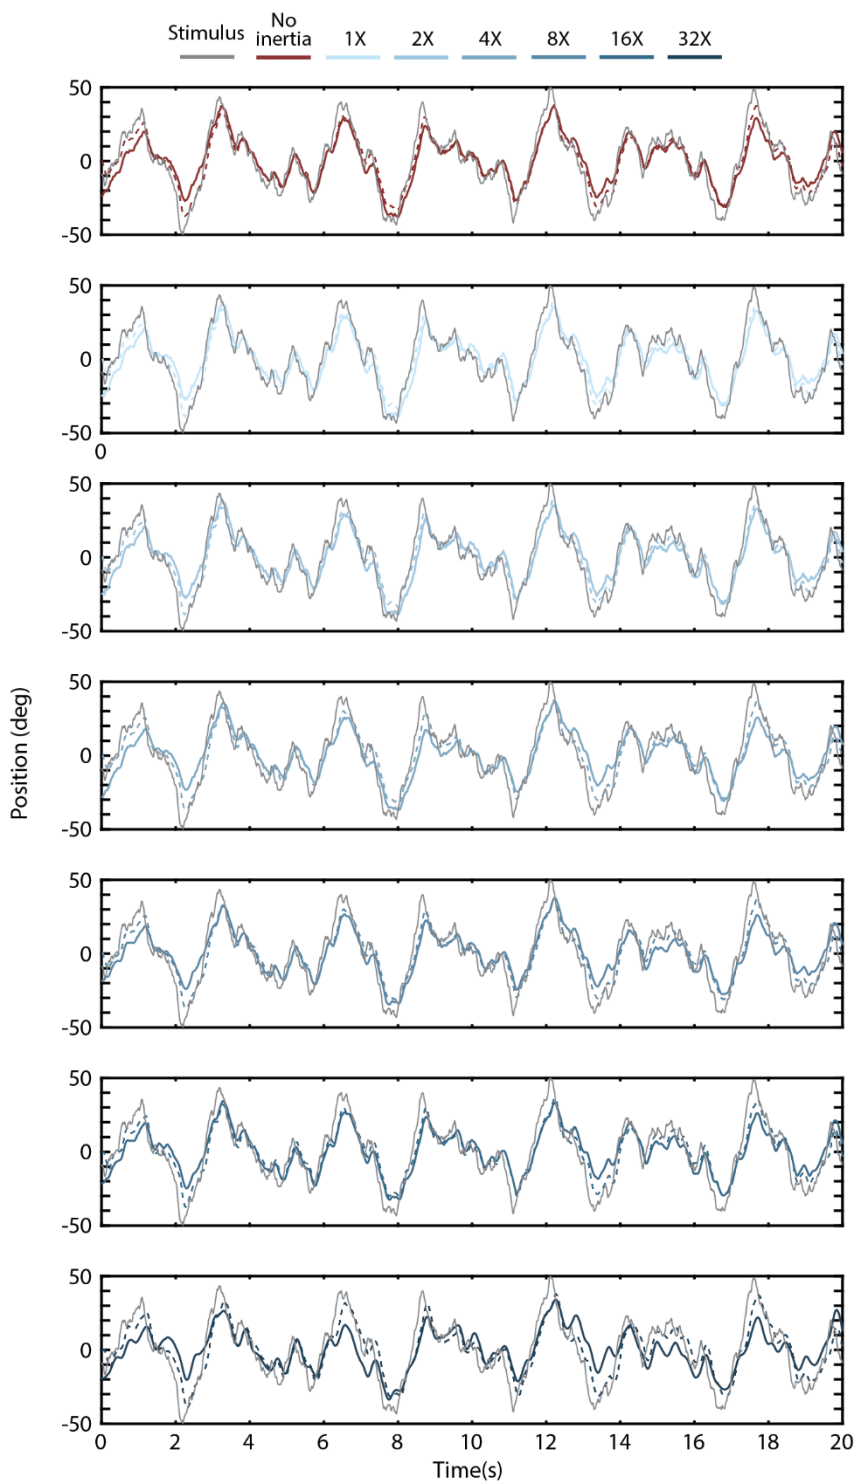

**Figure S4.** Simulated (dashed lines) and actual mean response (solid lines) of inertia altered flies to the sum-of-sines visual stimulus (grey). No inertia added:  $n = 41$  flies; 1X:  $n = 11$  flies; 2X:  $n = 15$  flies; 4X:  $n = 19$  flies; 8X:  $n = 17$  flies; 16X:  $n = 17$  flies; 32X:  $n = 8$  flies.

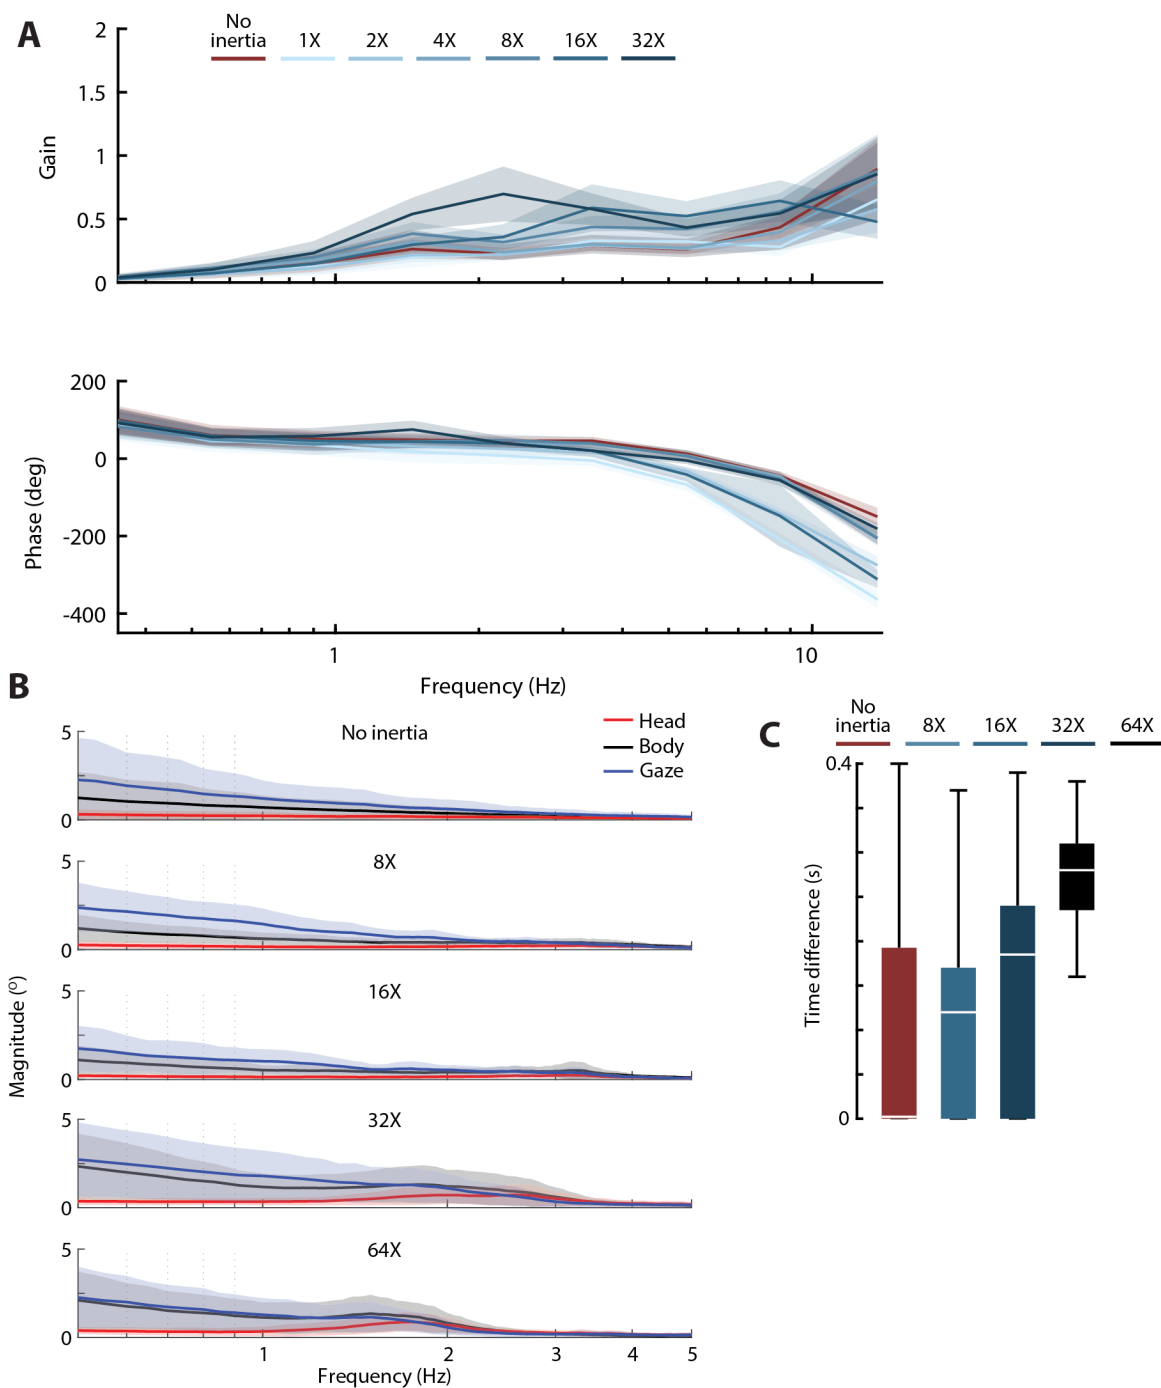

**Figure S5.** Impact of increasing body inertia on head motion in the presence and absence of a moving stimulus A) The frequency response of the head for a visual sum-of-sines stimulus. B) A magnitude plot of head oscillations for magnetically tethered flies presented with a static stimulus. C) Time difference between the head and body response to a static background. No added inertia:  $n = 13$  flies; 16X inertia:  $n = 7$  flies; 32X inertia:  $n = 9$  flies; 64X inertia:  $n = 13$  flies.

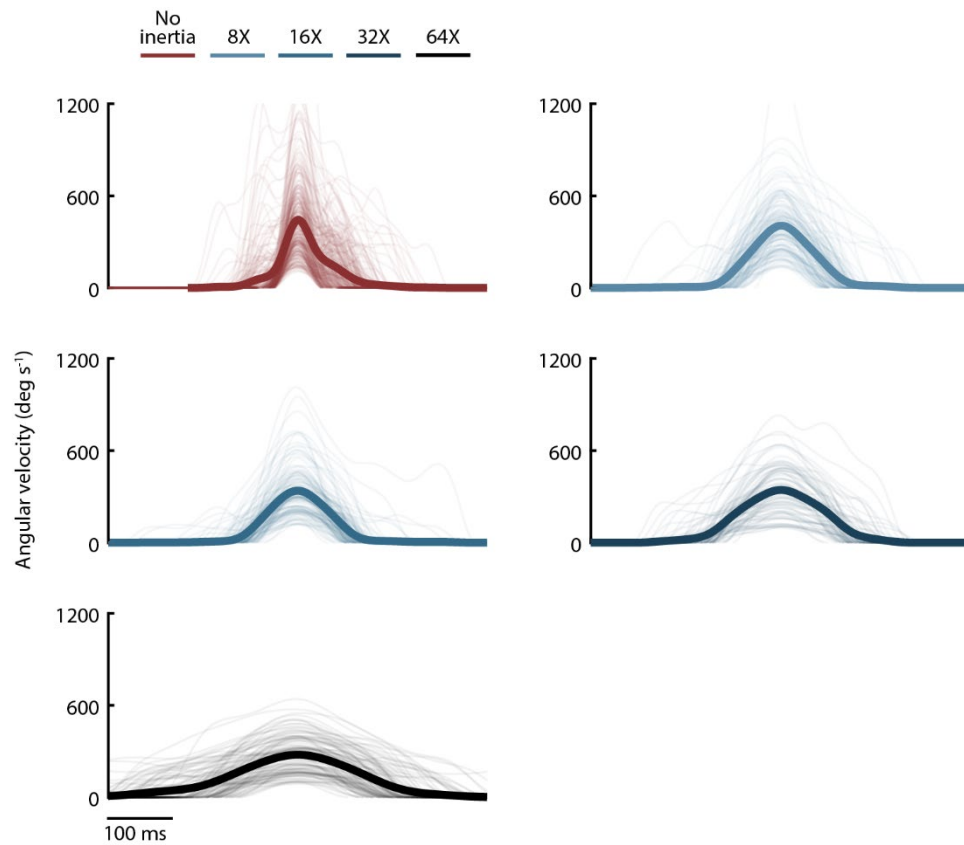

**Figure S6.** Average saccade velocity profiles (solid lines) along with individual saccades (thin lines). No added inertia:  $n = 301$  saccades from 13 flies; 8X:  $n = 148$  saccades from 9 flies; 16X:  $n = 139$  saccades from 7 flies; 32X:  $n = 89$  saccades from 9 flies; 64X:  $n = 118$  saccades from 13 flies.

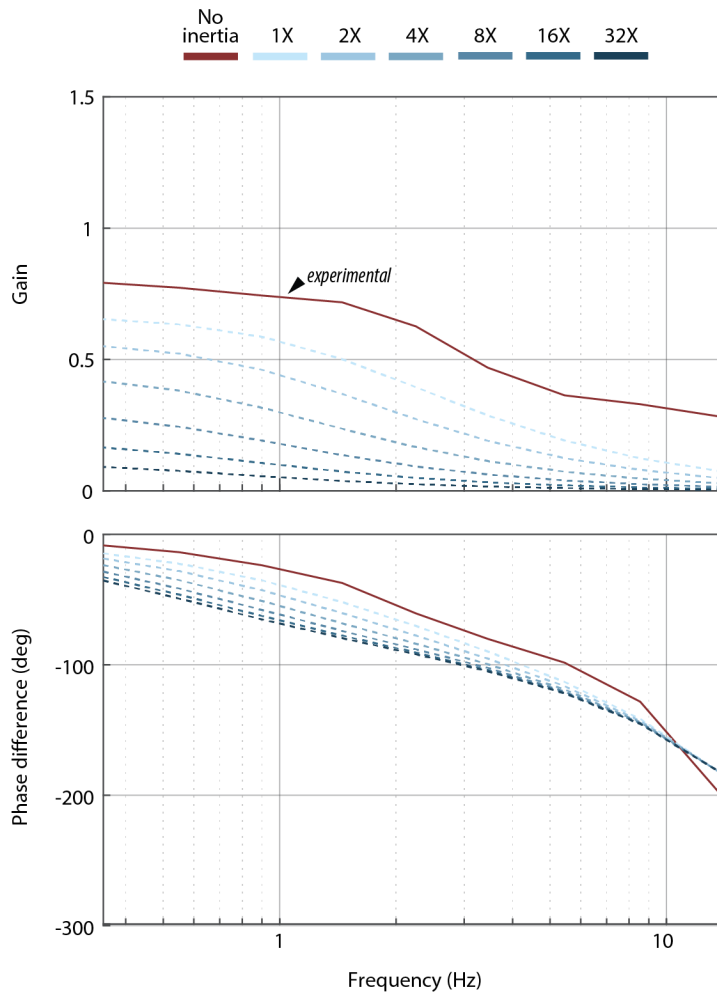

**Figure S7.** Predicted closed-loop frequency response functions if flies only altered damping in response to changes in inertia. Prediction: dashed lines. Empirical frequency response function for no-added-inertia flies: solid line. The simulation predicts a drastic drop in gain at all frequencies.



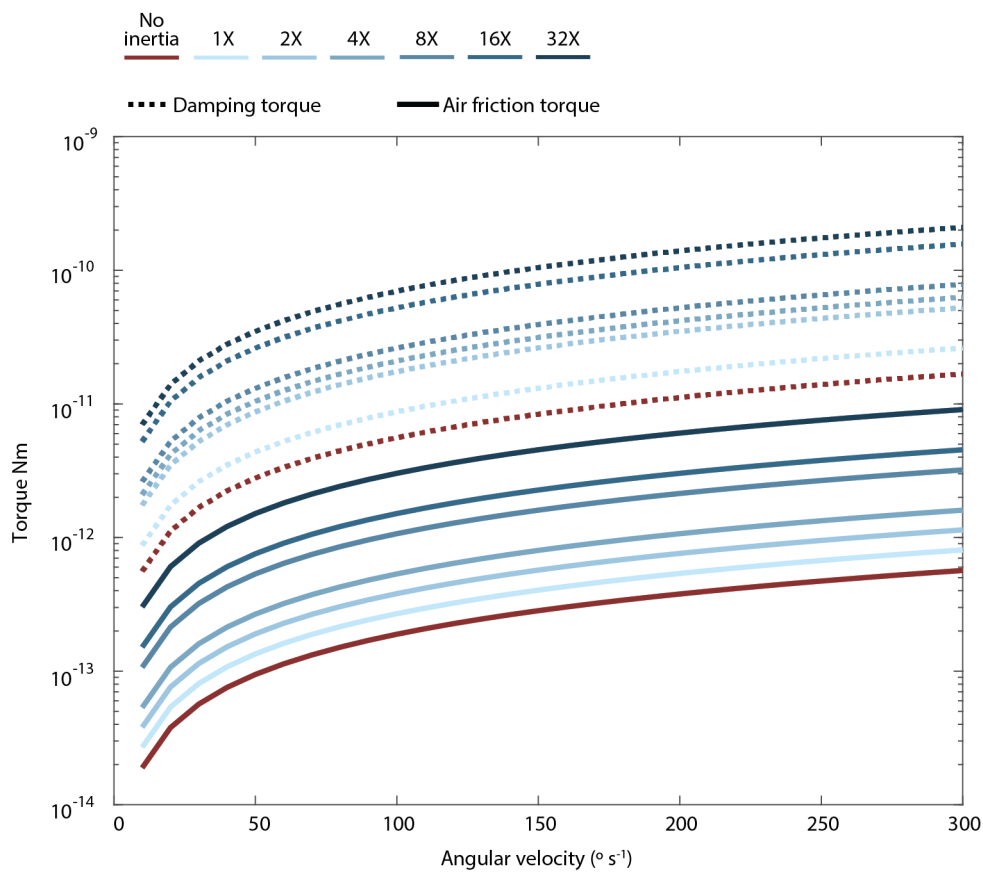

**Figure S8.** Aerodynamic torque (solid line) and the resulting flapping counter-torque (passive damping; dashed lines) that are produced due to rotation about the yaw axis. The yaw damping of the fly is approximately two orders of magnitude larger than the friction torque produced by the cylinder rotation.

**Table S1.** Gain (average). *p* values computed from ANOVA, DOF = 6. No inertia added *n* = 41 flies; 1X *n* = 11 flies; 2X *n* = 15 flies; 4X *n* = 19 flies; 8X *n* = 17 flies; 16X *n* = 17 flies; 32X *n* = 8 flies.

| Frequency      | 0.35         | 0.55         | 0.9         | 1.45           | 2.25          | 3.45          | 5.45           | 8.55           | 13.7           |
|----------------|--------------|--------------|-------------|----------------|---------------|---------------|----------------|----------------|----------------|
| Inertia        |              |              |             |                |               |               |                |                |                |
| 0              | 0.792        | 0.773        | 0.744       | 0.718          | 0.626         | 0.469         | 0.364          | 0.33           | 0.283          |
| 1              | 0.812        | 0.813        | 0.781       | 0.773          | 0.704         | 0.52          | 0.403          | 0.377          | 0.412          |
| 2              | 0.760        | 0.761        | 0.721       | 0.704          | 0.65          | 0.479         | 0.321          | 0.248          | 0.304          |
| 4              | 0.759        | 0.746        | 0.731       | 0.688          | 0.574         | 0.412         | 0.307          | 0.274          | 0.223          |
| 8              | 0.756        | 0.797        | 0.738       | 0.739          | 0.741         | 0.551         | 0.369          | 0.238          | 0.064          |
| 16             | 0.737        | 0.734        | 0.731       | 0.773          | 0.825         | 0.674         | 0.358          | 0.207          | 0.055          |
| 32             | 0.726        | 0.709        | 0.788       | 1.056          | 1.105         | 0.406         | 0.116          | 0.045          | 0.051          |
| <b>p-value</b> | <b>0.122</b> | <b>0.081</b> | <b>0.48</b> | <b>1.7e-14</b> | <b>2.6e-9</b> | <b>1.2e-4</b> | <b>1.1e-13</b> | <b>1.6e-18</b> | <b>1.6e-23</b> |

**Table S2.** Phase (average). *p* values computed from ANOVA, DOF = 6. No inertia added *n* = 41 flies; 1X *n* = 11 flies; 2X *n* = 15 flies; 4X *n* = 19 flies; 8X *n* = 17 flies; 16X *n* = 17 flies; 32X *n* = 8 flies.

| Frequency      | 0.35        | 0.55          | 0.9          | 1.45          | 2.25           | 3.45           | 5.45           | 8.55           | 13.7           |
|----------------|-------------|---------------|--------------|---------------|----------------|----------------|----------------|----------------|----------------|
| Inertia        |             |               |              |               |                |                |                |                |                |
| 0              | -8.46       | -13.65        | -23.69       | -37.24        | -60.58         | -80.11         | -98.37         | -128.3         | -198.95        |
| 1              | -6.7        | -13.68        | -25.33       | -36.57        | -65.77         | -91            | -113.88        | -163.19        | -273.93        |
| 2              | -7.48       | -17.36        | -28.21       | -44.9         | -74.08         | -103.98        | -132.94        | -174.52        | -304.36        |
| 4              | -11.84      | -19.19        | -28.56       | -53.35        | -79.39         | -106.56        | -131.78        | -186.68        | -349.92        |
| 8              | -9.27       | -17.71        | -27.23       | -49.53        | -75.64         | -115.84        | -156.77        | -227.61        | -434.17        |
| 16             | -8.44       | -17.96        | -27.34       | -42.74        | -76.74         | -125.97        | -184.58        | -269.82        | -450.38        |
| 32             | -8.32       | -17.94        | -29.54       | -49.48        | -118.93        | -183.38        | -222.75        | -340.02        | -478.95        |
| <b>p-value</b> | <b>0.53</b> | <b>0.0025</b> | <b>0.073</b> | <b>1.2e-6</b> | <b>6.1e-32</b> | <b>3.2e-52</b> | <b>4.1e-54</b> | <b>6.5e-67</b> | <b>3.4e-68</b> |

**Table S3.** Coherence (average). *p* values computed from ANOVA, DOF = 6. No inertia added *n* = 41 flies; 1X *n* = 11 flies; 2X *n* = 15 flies; 4X *n* = 19 flies; 8X *n* = 17 flies; 16X *n* = 17 flies; 32X *n* = 8 flies.

| Frequency      | 0.35     | 0.55     | 0.9      | 1.45     | 2.25     | 3.45     | 5.45     | 8.55     | 13.7     |
|----------------|----------|----------|----------|----------|----------|----------|----------|----------|----------|
| Inertia        |          |          |          |          |          |          |          |          |          |
| 0              | 0.91     | 0.92     | 0.9      | 0.9      | 0.87     | 0.85     | 0.84     | 0.83     | 0.75     |
| 1              | 0.88     | 0.9      | 0.89     | 0.89     | 0.87     | 0.86     | 0.81     | 0.77     | 0.62     |
| 2              | 0.89     | 0.92     | 0.9      | 0.91     | 0.88     | 0.87     | 0.82     | 0.74     | 0.64     |
| 4              | 0.88     | 0.9      | 0.88     | 0.88     | 0.84     | 0.82     | 0.8      | 0.74     | 0.6      |
| 8              | 0.86     | 0.88     | 0.85     | 0.85     | 0.82     | 0.81     | 0.79     | 0.7      | 0.57     |
| 16             | 0.79     | 0.81     | 0.78     | 0.79     | 0.77     | 0.75     | 0.73     | 0.67     | 0.65     |
| 32             | 0.75     | 0.77     | 0.75     | 0.76     | 0.7      | 0.66     | 0.58     | 0.47     | 0.66     |
| <b>p-value</b> | <b>0</b> | <b>0</b> | <b>0</b> | <b>0</b> | <b>0</b> | <b>0</b> | <b>0</b> | <b>0</b> | <b>0</b> |

**Table S4.** Hedge's g for added inertia flies compared to the baseline no added inertia flies. No added inertia  $n = 301$  saccades; 8X  $n = 148$  saccades; 16X  $n = 139$  saccades; 32X  $n = 89$  saccades; 64X  $n = 118$  saccades

| Inertia added                                  | 8X   | 16X  | 32X  | 64X  |
|------------------------------------------------|------|------|------|------|
| Displacement ( $^{\circ}$ )                    | 0.48 | 0.21 | 0.71 | 1    |
| Peak velocity ( $^{\circ}\cdot\text{s}^{-1}$ ) | 0.12 | 0.41 | 0.37 | 0.62 |
| Duration (s)                                   | 1    | 1.1  | 2.3  | 2.8  |

**Table S5.** Cylinder designed and actual average inertias along with the cylinder sizes

| Inertia factor | Designed inertia ( $\text{kg}\cdot\text{m}^2$ ) | Measured inertia ( $\text{kg}\cdot\text{m}^2$ ) | Height (mm) | Outer Diameter (mm) | Inner Diameter (mm) |
|----------------|-------------------------------------------------|-------------------------------------------------|-------------|---------------------|---------------------|
| 1              | $5.2\times 10^{-13}$                            | $5.75\times 10^{-13}$                           | 0.70        | 1.60                | 0.60                |
| 2              | $10.4\times 10^{-13}$                           | $11.3\times 10^{-13}$                           | 0.70        | 1.91                | 0.60                |
| 4              | $20.8\times 10^{-13}$                           | $22.8\times 10^{-13}$                           | 0.70        | 2.27                | 0.60                |
| 8              | $41.6\times 10^{-13}$                           | $42.2\times 10^{-13}$                           | 0.70        | 2.69                | 0.60                |
| 16             | $83.2\times 10^{-13}$                           | $84.6\times 10^{-13}$                           | 1.40        | 2.69                | 0.60                |
| 32             | $166\times 10^{-13}$                            | $167\times 10^{-13}$                            | 1.40        | 3.20                | 0.60                |
| 64             | $332\times 10^{-13}$                            | $334\times 10^{-13}$                            | 2.80        | 3.20                | 0.60                |

**Table S6.** Percent goodness of fit for different inertias. Mean  $\pm$  1 STD.

| Inertia factor       | Goodness of fit (GoF) % |
|----------------------|-------------------------|
| 0 (no added inertia) | $94.5 \pm 4.27$         |
| 1                    | $91.1 \pm 7.00$         |
| 2                    | $94.6 \pm 2.34$         |
| 4                    | $88.2 \pm 8.80$         |
| 8                    | $88.8 \pm 6.73$         |
| 16                   | $92.0 \pm 4.27$         |
| 32                   | $84.0 \pm 2.34$         |
| 64                   | Data not fit            |

**Movie S1.** Oscillations for a magnetically tethered fly with 64X added inertia presented with a static stimulus. Top left: Bottom view of a single fly within animated virtual reality arena during a full 20 s trial. Top right: Same as top left but shown in a body reference frame. Bottom: stimulus (green) and body (magenta). The arena is not drawn to scale for visual clarity. The cylinder in the body fixed flew appears off-axis due to camera perspective errors, i.e., the lens is not perfectly perpendicular to the fly and added cylinder. The video was recorded at 100 fps but showed at 50 fps.

**Movie S2.** Same as Movie S1 but for a fly with 2X added inertia presented a sum-of-sines stimulus. The video was recorded at 100 fps but showed at 50 fps.

## SI References

1. Childs PRN. 2011 Chapter 6 - Rotating Cylinders, Annuli, and Spheres. In (ed PRNBT-RF Childs), pp. 177–247. Oxford: Butterworth-Heinemann. (doi:<https://doi.org/10.1016/B978-0-12-382098-3.00006-8>)
